# Supplementary material for: Does adherence to a quality indicator regarding early weaning from invasive ventilation improve economic outcome? A single-centre retrospective study
Source: PubMed Central journal article supplement — BMJ Open. 2022 Jan 6;12(1):e045327. doi: 10.1136/bmjopen-2020-045327 (PMC8739420; doi:10.1136/bmjopen-2020-045327), 2022-01-06
Supplement: bmjopen-2020-045327.draft_revisions.pdf [file bmjopen-2020-045327.draft_revisions.pdf]

# BMJ Open

BMJ Open is committed to open peer review. As part of this commitment we make the peer review history of every article we publish publicly available.

When an article is published we post the peer reviewers' comments and the authors' responses online. We also post the versions of the paper that were used during peer review. These are the versions that the peer review comments apply to.

The versions of the paper that follow are the versions that were submitted during the peer review process. They are not the versions of record or the final published versions. They should not be cited or distributed as the published version of this manuscript.

BMJ Open is an open access journal and the full, final, typeset and author-corrected version of record of the manuscript is available on our site with no access controls, subscription charges or pay-per-view fees (<http://bmjopen.bmj.com>).

If you have any questions on BMJ Open's open peer review process please email [info.bmjopen@bmj.com](mailto:info.bmjopen@bmj.com)

# BMJ Open

## Intensive Care Economics: Impact of Adherence to the Quality Indicator Weaning on Economic Outcome.

|                               |                                                                                                                                                                                                                                                                                                                                                                                                                                                                                                                                                                                                                                                                                                                                                                                                                                                                                                                                                                                                                                                                                                                                                                            |
|-------------------------------|----------------------------------------------------------------------------------------------------------------------------------------------------------------------------------------------------------------------------------------------------------------------------------------------------------------------------------------------------------------------------------------------------------------------------------------------------------------------------------------------------------------------------------------------------------------------------------------------------------------------------------------------------------------------------------------------------------------------------------------------------------------------------------------------------------------------------------------------------------------------------------------------------------------------------------------------------------------------------------------------------------------------------------------------------------------------------------------------------------------------------------------------------------------------------|
| Journal:                      | <i>BMJ Open</i>                                                                                                                                                                                                                                                                                                                                                                                                                                                                                                                                                                                                                                                                                                                                                                                                                                                                                                                                                                                                                                                                                                                                                            |
| Manuscript ID                 | bmjopen-2020-045327                                                                                                                                                                                                                                                                                                                                                                                                                                                                                                                                                                                                                                                                                                                                                                                                                                                                                                                                                                                                                                                                                                                                                        |
| Article Type:                 | Original research                                                                                                                                                                                                                                                                                                                                                                                                                                                                                                                                                                                                                                                                                                                                                                                                                                                                                                                                                                                                                                                                                                                                                          |
| Date Submitted by the Author: | 30-Sep-2020                                                                                                                                                                                                                                                                                                                                                                                                                                                                                                                                                                                                                                                                                                                                                                                                                                                                                                                                                                                                                                                                                                                                                                |
| Complete List of Authors:     | Zuber, Alexander; Charité Universitätsmedizin Berlin, Department of Gynecology Campus Virchow; Charité Universitätsmedizin Berlin, Department of Anesthesiology and Operative Intensive Care Medicine<br>Kumpf, Oliver; Charité Universitätsmedizin Berlin, Department of Anesthesiology and operative Intensive Care Medicine (CCM/CVK)<br>Spies, Claudia; Charité Universitätsmedizin Berlin, Department of Anesthesiology and Operative Intensive Care Medicine<br>Höft, Moritz; Charité Universitätsmedizin Berlin, Department of Anesthesiology and Operative Intensive Care Medicine<br>Deffland, Marc; Charité Universitätsmedizin Berlin, Department of Anesthesiology and Operative Intensive Care Medicine<br>Ahlborn, Robert; Charité Universitätsmedizin Berlin, IT Department<br>Kruppa, Jochen; Charité Universitätsmedizin Berlin, Institute of Biometry and Clinical Epidemiology; Berlin Institute of Health<br>Jochem, Roland; TU Berlin, Departments of Machine Tools and Factory Management<br>Balzer, Felix; Charité Universitätsmedizin Berlin, Department of Anesthesiology and Operative Intensive Care Medicine; Einstein Center , Digital Future |
| Keywords:                     | INTENSIVE & CRITICAL CARE, Quality in health care < HEALTH SERVICES ADMINISTRATION & MANAGEMENT, HEALTH ECONOMICS                                                                                                                                                                                                                                                                                                                                                                                                                                                                                                                                                                                                                                                                                                                                                                                                                                                                                                                                                                                                                                                          |
|                               |                                                                                                                                                                                                                                                                                                                                                                                                                                                                                                                                                                                                                                                                                                                                                                                                                                                                                                                                                                                                                                                                                                                                                                            |

SCHOLARONE™  
Manuscripts

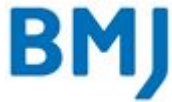

I, the Submitting Author has the right to grant and does grant on behalf of all authors of the Work (as defined in the below author licence), an exclusive licence and/or a non-exclusive licence for contributions from authors who are: i) UK Crown employees; ii) where BMJ has agreed a CC-BY licence shall apply, and/or iii) in accordance with the terms applicable for US Federal Government officers or employees acting as part of their official duties; on a worldwide, perpetual, irrevocable, royalty-free basis to BMJ Publishing Group Ltd ("BMJ") its licensees and where the relevant Journal is co-owned by BMJ to the co-owners of the Journal, to publish the Work in this journal and any other BMJ products and to exploit all rights, as set out in our [licence](#).

The Submitting Author accepts and understands that any supply made under these terms is made by BMJ to the Submitting Author unless you are acting as an employee on behalf of your employer or a postgraduate student of an affiliated institution which is paying any applicable article publishing charge ("APC") for Open Access articles. Where the Submitting Author wishes to make the Work available on an Open Access basis (and intends to pay the relevant APC), the terms of reuse of such Open Access shall be governed by a Creative Commons licence – details of these licences and which [Creative Commons](#) licence will apply to this Work are set out in our licence referred to above.

Other than as permitted in any relevant BMJ Author's Self Archiving Policies, I confirm this Work has not been accepted for publication elsewhere, is not being considered for publication elsewhere and does not duplicate material already published. I confirm all authors consent to publication of this Work and authorise the granting of this licence.

**Title:****Intensive Care Economics: Impact of Adherence to the Quality Indicator Weaning on Economic Outcome.****Authors:**

Zuber A<sup>1,2</sup>, Kumpf O<sup>2</sup>, Spies C<sup>2</sup>, Höft M<sup>2</sup>, Deffland M<sup>2</sup>, Ahlborn R<sup>3</sup>, Kruppa J<sup>4,5</sup>, Jochem R<sup>6</sup> and Balzer F<sup>2,7</sup>

<sup>1</sup> Department of Gynecology, Charité - Universitätsmedizin Berlin, corporate member of Freie Universität Berlin, Humboldt-Universität zu Berlin, and Berlin Institute of Health, Augustenburger Platz 1, 13353 Berlin, Germany

<sup>2</sup> Department of Anesthesiology and Operative Intensive Care Medicine, Campus Virchow-Klinikum and Campus Charité Mitte, Charité - Universitätsmedizin Berlin, corporate member of Freie Universität Berlin, Humboldt-Universität zu Berlin, and Berlin Institute of Health, Augustenburger Platz 1, 13353 Berlin

<sup>3</sup> IT Department of Charité - Universitätsmedizin Berlin, corporate member of Freie Universität Berlin, Humboldt-Universität zu Berlin, and Berlin Institute of Health, Charitéplatz 1, 10117 Berlin, Germany

<sup>4</sup> Institute of Biometry and Clinical Epidemiology, Charité - Universitätsmedizin Berlin, corporate member of Freie Universität Berlin, Humboldt-Universität zu Berlin, and Berlin Institute of Health, Charitéplatz 1, 10117, Berlin, Germany

<sup>5</sup> Berlin Institute of Health (BIH), Anna-Louisa-Karsch 2, 10178, Berlin, Germany

<sup>6</sup> Departments of Machine Tools and Factory Management, Technical University Berlin, Pascalstr. 8-9, 10587 Berlin, Germany

<sup>7</sup> Einstein Center for Digital Future, Berlin, Germany

**Corresponding Author:**

Professor Felix Balzer

Department of Anesthesiology and Operative Intensive Care Medicine, Campus Virchow-Klinikum and Campus Charité Mitte, Charité - Universitätsmedizin Berlin, corporate member of Freie Universität Berlin, Humboldt-Universität zu Berlin, and Berlin Institute of Health, Augustenburger Platz 1, 13353 Berlin

Einstein Center Digital Future, Berlin, Germany

E-Mail: felix.balzer@charite.de

**Orcid-IDs:**

Felix Balzer: <https://orcid.org/0000-0003-1575-2056>

Claudia Spies: <https://orcid.org/0000-0002-1062-0495>

**Key Words:** Critical Care, Intensive Care Unit, Quality Indicator, Transparency, Health Economics

**Type:** Original Research

**Word Count:** 4,190

**Supplementary and raw data:** Dataset anonymized upon request

**ABSTRACT**

**Objectives** To measure and assess the economic impact of adherence to a single quality indicator regarding weaning from invasive ventilation.

**Design** Retrospective observational single center study, based on electronic medical and administrative records.

**Setting** ICU of a German university hospital, reference center for acute respiratory distress syndrome.

**Participants** Records of 3,063 consecutive mechanically ventilated patients admitted to the ICU between 2012 and 2017 were extracted, of whom 583 were eligible adults for further analysis. Patients' weaning protocols were evaluated for daily adherence to quality standards until ICU discharge. Patients with <65% compliance were assigned to the low adherence group (LAG), patients with ≥65% to the high adherence group (HAG).

**Primary and secondary outcome measures** Economic health care costs, clinical outcomes and patients' characteristics.

**Results** The LAG consisted of 378 patients with a median negative economic results of -3,969€, HAG of 205 (-1,030€) respectively ( $P < 0.001$ ). Median duration of ventilation was 476 [248;769] hours in the LAG and 389 [247;608] hours in the HAG ( $P < 0.001$ ). Length of stay in the LAG on ICU was 21 [12;35] days and 16 [11;25] days in the HAG ( $P < 0.001$ ). Length of stay in the hospital was 36 [22;61] days in the LAG, and within the HAG respectively 26 [18;48] days ( $P = 0.001$ ).

**Conclusions** High adherence to this single quality indicator is associated with better clinical outcome and improved economic returns. Therefore, the results support the adherence to quality indicator. However, the examined quality indicator does not influence economic outcome as the decisive factor.

**Strengths and limitations of this study:**

- This is the first study evaluating whether a quality indicator on weaning has effects on the economic outcome parameters on a per case basis
- Results of the cost unit accounting practice is well established and is thus representative for a detailed examination of unit costs
- The test and validation sample was taken from a reference center specialized on acute respiratory distress syndrome in adult patients with severe medical conditions
- Control for interactions with other quality indicators is necessary as the examined quality indicator is potentially connected with other ones
- The study results are based on German reimbursement system and might be typical for a tertiary university hospital rather than all German hospitals

## 71 INTRODUCTION

72 In the last decades, the need for quality management (QM) in the hospital has been growing. On one  
73 hand costs have been rising and on the other patients, health insurance and public pressure urge  
74 hospitals to improve outcome and services by cutting or tying reimbursement to valid quality  
75 indicators (QI) [1]. This is why in the medium and long run quality-oriented reimbursement (pay for  
76 quality) might change the hospital landscape [2]. Economics of health have been established widely  
77 in order to curb costs for the national health care system. Many countries introduced diagnosis  
78 related groups (DRGs) in order to pay on averaged costs and on a generalized financial  
79 reimbursement per case (fixed prices). The fee-for-service system induces hospitals to improve  
80 internal processes and to work goal-oriented towards therapeutic aims [3].

81 In modern medicine, a major part of hospital costs arises from intensive care. The cost structure of a  
82 German hospital shows that ca. 20% of costs are generated in intensive care units (ICU) [4].  
83 Especially, mechanical ventilation is the main cost driver in ICUs [5]. Approximately 6% of the  
84 patients in intensive care are affected by prolonged mechanical ventilation and weaning from  
85 mechanical ventilation represents an essential element in the treatment of critically ill patients as it  
86 can take up to 50% of the ventilation time [6]. As a consequence, up to 37% of all ICU resources are  
87 allocated to these patients [7]. This means that weaning patients from mechanical ventilation is not  
88 only essential for clinical outcomes like duration of ventilation or length of stay [8,9], but also a  
89 critical step from an economic perspective as costs can be reduced. Therefore, this process is a  
90 critical phase in intensive care. However, the ideal weaning process is still subject to debate [10].  
91 About 40% of patients receiving mechanical ventilation will experience a complicated weaning  
92 process [11]. Patients categorized in prolonged weaning, failing at least three spontaneous breathing  
93 trials or receiving more than seven days of weaning after the first spontaneous breathing trials, have  
94 an increased risk in developing hospital mortality, mainly through ventilator-associated pneumonia  
95 (VAP) [6], but also through post intensive care syndrome (PICS) or chronic critical illness (CCI) [12].  
96 Due to demographic changes and technological advances in intensive care, the number of older  
97 patients with complex diseases or comorbidities needing ventilation is increasing [13,14]. This  
98 generates growing costs, as the cohort of patients requiring respiratory support accounts for a  
99 disproportionate percentage of the resources available in intensive care [15].

100 With the purpose of managing quality throughout the difficult framework conditions of hospital care,  
101 a proactive and structured QM is essential [16]. In general, QM focuses on securing and improving  
102 clinical services economically, performed by physicians or nurses according to the patient's needs  
103 [17]. In Germany, in the context of European and national QM initiatives, consensus-based  
104 standardized QIs were developed for intensive care medicine since 2010 – third version in 2017 – by  
105 the German interdisciplinary society for intensive and emergency care (DIVI) in order to simplify the  
106 measurement of relevant quality data, to record timely and to allow transparent comparisons of  
107 patient data. The according quantification of QM helps measuring effectiveness and efficiency of  
108 ICUs [18,19]. QIs enable a descriptive picture of the actual condition and are an indispensable  
109 instrument for comparisons between different states of quality [18]. Potentially, widely-accepted QIs  
110 can progress hospital economics and support the reduction of the national budget for health care,  
111 even though a recent study has shown that cost-quality relationships are difficult to generate [20].

112 QIs empower advances in intensive care medicine to be measured and evaluated on a regular basis  
113 [19]. QIs can be defined as representative figures for quality of structure, processes or outcome  
114 within the medical care process. Thus, indicators are useful for measuring improvement in the  
115 context of quality management and should be developed in line with evidence-based literature [21].  
116 Ideally, measures for QIs can be extracted from routine patient data to avoid excess documentation

1  
2  
3  
4 117 work. Therefore, patient data management systems (PDMS) are pivotal for measuring complex  
5 118 quality figures [18]. The economic aspects for the whole hospital of the introduction of QIs are not  
6 119 well investigated. However, there is evidence that the application of QIs is a value-creating instrument  
7 120 [12].  
8

9 121 The objective of this study was, to determine the economic impact of adherence to a single quality  
10 122 indicator evaluating the weaning process from invasive ventilation. We analyzed this by comparing  
11 123 economic results per case and clinical outcome parameters like length of stay (LOS) between two  
12 124 groups of either high or low quality adherence. Additionally, we sought to determine factors that  
13 125 would influence a potential interaction between economic and outcome parameters.  
14  
15

## 16 126 **METHODS**

17  
18 127 This original research is in accordance with the Consolidated Health Economic Evaluation Research  
19 128 Standards (CHEERS).  
20

### 21 129 **Study Center**

22  
23 130 We conducted this single study-center in a university hospital (Charité - Universitätsmedizin Berlin).  
24 131 This observational analysis was performed at a 14-bed intensive care unit (reference center),  
25 132 specialized for acute respiratory distress syndrome in adult patients. All patients at our ICU were  
26 133 treated according to guidelines and internal standard operating procedures for clinical practice [22].  
27

### 28 134 **Study Design**

29  
30 135 This was a retrospective descriptive study, using data from multiple electronic databases used in  
31 136 routine patient care and for routine administrative purposes. All patients admitted to and discharged  
32 137 from the ICU between 1 January 2012 and 31 December 2017 who received invasive ventilation  
33 138 during their stay were eligible to be included in this study. Furthermore, duration of ventilation <95  
34 139 hours, receiving no invasive ventilation, terminal status, incomplete patient record or missing  
35 140 readiness to be weaned were defined as exclusion criteria (see figure 1).  
36  
37

38 141 The study was approved by the Ethics Commission at Charité (EA2/139/20). Informed patient  
39 142 consent was waived due to retrospective study design. Confidentiality was guaranteed, no  
40 143 interventions were performed and only clinical routine data were collected. Data were retrieved  
41 144 from a PDMS called COPRA (Computer Organized Patient Report Assistant; COPRA System GmbH,  
42 145 Berlin, Germany). Data are recorded both automatically by patient monitors and manually by  
43 146 caregivers. The ICU staff validates all information manually. However, the design of the PDMS  
44 147 prevents manual alterations to the data, for example adding missing values after discharge from the  
45 148 ICU. PDMS data are also transferred to the clinical information and accounting system (SAP, Walldorf,  
46 149 Germany). Based on this administrative system, cost unit accounting is performed annually. In  
47 150 addition to basic demographic data, we assessed clinical and administrative parameters of in-patient  
48 151 cases (e.g. LOS). Data were retrieved using a structured query. No patient identifiers were extracted  
49 152 in order to secure anonymity of patients' data.  
50  
51  
52

53 153 PDMS data of patients included in the study were transferred to the study database, where we also  
54 154 collected the administrative and cost accounting data respectively. We contrasted patient, intensive  
55 155 care and economic parameters of the two adherence groups (see table 1). Then, we calculated the  
56 156 profits per case by subtracting costs of reimbursement per case. In order to generate an economic  
57 157 outcome per case for the dependent variable in multivariate linear regression. Besides administrative  
58 158 data, we used different scores for assessing the QI for eligibility. Selection criteria were: (i) no  
59 159 additional workload required for documentation, (ii) the availability within the PDMS system, (iii)

1  
2  
3  
4 160 standardized values for all patients and the existence of standard operating procedures for each  
5 161 indicator and (iv) the relevance of the indicator for clinical decision-making [19,23].

## 6 7 162 **Procedures**

8  
9 163 In this study, we used present KPIs in order to examine the adherence to the quality indicator “Early  
10 164 Weaning from Invasive Ventilation” until ICU discharge [8]. A small set of evidence-based key  
11 165 performance indicators (KPIs) was established in 2009, providing indicators that were already  
12 166 available within the PDMS. The KPIs in intensive care medicine proved helpful for practical use and  
13 167 compliance with standard operating procedures. Within the weaning therapy, fast visual feedback  
14 168 for “readiness to wean” and “weaning protocol compliance” were implemented. If both KPIs were  
15 169 positive, the according result of the “spontaneous breathing trial” (SBT) was recorded [23]. Once the  
16 170 patient was assessed to be ready to wean since the primary disease showed clinical improvement,  
17 171 the standard weaning protocol activities were conducted on a daily basis according to standard  
18 172 operating procedures. Congruent with clinical guidelines in place, weaning protocols were adapted to  
19 173 evaluate the progress of respirator therapy [22]. The subsequent result was recorded in the weaning  
20 174 protocol. For each patient, we monitored the daily weaning protocol compliance between readiness  
21 175 to wean and ICU-discharge in order to evaluate the percentage of adherence. Within the weaning  
22 176 process, the SBT represents the major diagnostic test to evaluate if the patient can be extubated  
23 177 successfully [10]. The SBT is successful if the patient succeeded the trial and does not have to be re-  
24 178 intubated within 48 hours [24].

## 28 29 179 **Outcome Parameters**

30  
31 180 In this study, we investigated for economic results, clinical outcome parameters per case and the  
32 181 respective adherence to quality. Economic results were defined as the profit or loss per case, by  
33 182 subtracting all assigned costs from the reimbursement on a case level. Clinical outcomes as a  
34 183 representative for clinical effectiveness were measured in order to set economic outcomes in  
35 184 relation to the purpose of medicine. Adherence to quality was calculated on a per case level in order  
36 185 to categorize the patients into groups.

37  
38 186 We used the adherence level of the examined quality indicator in order to create two quality groups.  
39 187 We calculated the final quality level by averaging the daily indicator results for the duration with  
40 188 equal weights per day. In order to set the optimal cutoff point for dichotomously distinguishing  
41 189 between high-adherence and low-adherence of weaning quality, we combined recommendations  
42 190 from literature with our institutional standards. A cutoff value of 70% deemed as a suitable  
43 191 fulfillment-threshold for quality indicators [25]. However, due to partially high workload under  
44 192 certain circumstances in intensive care, we decided to lower the cutoff for 5% tolerance in order to  
45 193 account for missing values in documentation. Therefore, we inserted a cutoff for weaning protocol  
46 194 compliance at 65% adherence. The LAG was defined as adherence to QI of less than 65%. The HAG  
47 195 was defined as adherence to QI of equal or more than 65%. Once this threshold was reached, the QI  
48 196 was characterized as high-adherence.

## 52 53 197 **Statistical Analyses**

54  
55 198 Descriptive analyses and statistical testing were performed using SPSS, version 14.0 (SPSS Inc.,  
56 199 Chicago, IL, USA) for Windows. Results are expressed as median (interquartile range) or frequency  
57 200 (%). We controlled data for risk and severity by exclusion as patients and therapies in intensive care  
58 201 are heterogenic, as studies have shown [18]. Differences between the adherence groups in terms of  
59 202 outcome parameters were tested using the univariate unpaired t-test and chi-squared statistics for  
60 203 independent variables as appropriate with a *P*-value below 0.05 regarded as significant.



1  
2  
3  
4 204 In order to investigate the influencing factors in more detail, parameters that were found to be  
5 205 statistically significant on univariate analysis or out of discussion among the experts underwent  
6 206 stepwise multivariate analyses. We used multiple linear regression analyses to model the  
7 207 relationship between the independent variables and the outcome of profitability. Regression  
8 208 coefficients (95% CI) and the corresponding *P*-values were calculated for each factor. Testing the  
9 209 dataset for outliers was performed using the cook distance test, based on the model. The test did not  
10 210 indicate the need to dismiss cases from the sample. Due to an exploratory character of the research,  
11 211 no adjustments for multiple testing were made.

#### 14 212 **Patient and public involvement**

15  
16 213 Patients and the public were not directly involved in this observational study.

#### 18 214 **RESULTS**

19  
20 215 All patients with complete electronic patient records (n=3,063 patients) were screened for eligibility.  
21 216 After selection regarding inclusion and exclusion criteria, 583 patients were included in the final  
22 217 analysis (Figure 1). Of these patients, 378 showed low-adherence if the indicator was below 65% and  
23 218 205 showed high-adherence. The median age of admitted patients was 57 [40;70] years; 64.7 % of  
24 219 patients were male. There were significantly (*P* = 0.038) more male patients within the HAG (70.2%)  
25 220 than in the LAG (61.6%). As reflected by a median APACHE II admission score of 21 [14;27], a SAPS II  
26 221 admission score of 47 [34;61] and a SOFA admission score of 9 [7;12], the study population was  
27 222 characterized by severe medical conditions. Patient demographics are displayed in Table 1. Along the  
28 223 line, at discharge patients generated an average daily SOFA score of 8.2 [6.6;10.3] indicating  
29 224 resource-intensive monitoring and treatment of the patient.

30  
31  
32 225 In order to account for the remaining clinical patient outcomes after grouping, we analyzed the  
33 226 ventilation parameters. Overall in the median, patients were ventilated for 431 [250;709] hours on  
34 227 the ICU and 578 [338;924] throughout their hospital stay. Following the division into two adherence  
35 228 groups, there was a significant reduction in duration of ventilation on ICU from 476 to 389 hours (*P* <  
36 229 0.001). Overall in-hospital duration of ventilation was decreased from 597 to 535 hours (*P* = 0.017).  
37 230 Concerning the number of SBTs and reintubations, there was no significant finding (*P* = 0.456 and *P* =  
38 231 0.531). In addition to the significant decrease in ventilation parameters seen between the differences  
39 232 in adherence, the LOS was decreased by 5 days from 21 to 16 (*P* < 0.001) and overall in-hospital LOS  
40 233 decreased from 36 to 26 days per patient (*P* = 0.001) in the median, indicating strong arguments for  
41 234 quality indicator adherence. With regard to economic outcome, the overall median economic results  
42 235 (loss) per case was -2,999€. There was an increase in profitability from a median loss of 3,696€ to  
43 236 1,030€ (*P* < 0.001).

44  
45  
46  
47 237 Considering the discharge of the patients, there was a highly significant difference (*P* < 0.001)  
48 238 between both groups. Most patients were discharged to intermediate care (44.6%), other ICUs  
49 239 (27.6%) or rehabilitation (18.9%). Within the LAG, 50 (13.2%) patients died compared to 2 (1.0%) in  
50 240 the HAG. This gives room to assume a certain impact of weaning quality on mortality.

51  
52  
53 241

54  
55 242

**Table I. Patient demographics and outcome parameters in comparison between QI adherence groups**

|                                            | All Patients           | LAG<br>QI < 65%        | HAG<br>QI ≥ 65%        | P-Value |
|--------------------------------------------|------------------------|------------------------|------------------------|---------|
|                                            | n = 583                | n = 378                | n = 205                |         |
| <b>Demographics</b>                        |                        |                        |                        |         |
| Age [y]                                    | 57 [40;70]             | 57 [40;70]             | 55 [42;69]             | 0.770   |
| Gender [m]                                 | 377 (64.7%)            | 233 (61.6%)            | 144 (70.2%)            | 0.038   |
| ICU Score on admission                     |                        |                        |                        |         |
| · APACHE II                                | 21 [14;27]             | 21 [15;27]             | 21 [14;27]             | 0.986   |
| · SAPS II                                  | 47 [34;61]             | 47 [35;60]             | 47 [34;62]             | 0.860   |
| · SOFA                                     | 9 [7;12]               | 9 [7;12]               | 9 [7;13]               | 0.526   |
| Average SOFA                               | 8.2 [6.6;10.3]         | 8 [6.5;10.1]           | 8.4 [6.8;10.7]         | 0.140   |
| Type of admission to Study-ICU             |                        |                        |                        | 0.651   |
| · Medical                                  | 290 (49.7%)            | 190 (50.3%)            | 100 (48.8%)            |         |
| · Emergency surgery                        | 232 (39.8%)            | 146 (38.6%)            | 86 (41.9%)             |         |
| · Elective surgery                         | 61 (10.5%)             | 42 (11.1%)             | 19 (9.3%)              |         |
| <b>Outcome Parameter</b>                   |                        |                        |                        |         |
| Duration of Ventilation Study-ICU [h]      | 431 [250;709]          | 476 [248;769]          | 389 [247;608]          | <0.001  |
| Total Duration of Ventilation Hospital [h] | 578 [338;924]          | 597 [310;992]          | 535 [361;821]          | 0.017   |
| No. Spontaneous breathing trials (SBTs)    | 1 [0;2]                | 1 [0;2]                | 1 [0;2]                | 0.456   |
| No. Reintubation                           | 0 [0;1]                | 0 [0;1]                | 0 [0;1]                | 0.531   |
| Type of Discharge of Study-ICU             |                        |                        |                        | <0.001  |
| · ICU                                      | 161 (27.6%)            | 100 (26.5%)            | 61 (29.8%)             |         |
| · Intermediate / Ward                      | 260 (44.6%)            | 172 (45.5%)            | 88 (42.9%)             |         |
| · Rehabilitation                           | 110 (18.9%)            | 56 (14.8%)             | 54 (26.3%)             |         |
| · Death                                    | 52 (8.9%)              | 50 (13.2%)             | 2 (1.0%)               |         |
| LOS Study-ICU [d]                          | 19 [11;32]             | 21 [12;35]             | 16 [11;25]             | <0.001  |
| LOS Hospital [d]                           | 33 [20;54]             | 36 [22;61]             | 26 [18;48]             | 0.001   |
| Profit [€]                                 | -2,999 [-15,946;7,730] | -3,696 [-21,170;6,828] | -1,030 [-11,134;9,449] | <0.001  |

Discrete variables are presented as a total number of encounters and were analyzed with Chi square test for nonparametric samples.

APACHE II, Acute physiology and chronic health evaluation; SAPS, Simplified acute physiology score; SOFA, Sequential organ failure assessment; Average SOFA, Averaged sequential organ failure assessment; ICU, Intensive care unit; SBT, Spontaneous breathing trial; LOS, Length of stay, PACU, Post anesthesia care unit; OT, Operating theatre

243

## 244 **Multiple Linear Regression**

245 The results of the multivariate linear regression analysis of the complete study population of 583  
246 patients are given in table 2. The parameters were not adjusted for severity of illness. The fixed  
247 variables age, sex and percentage of quality indicator adherence examined did not show significant  
248 effects on profitability.

249 In the linear regression analysis, the LOS on the study-ICU ( $P < 0.001$ ), the LOS in the hospital ( $P =$   
250  $0.015$ ), the averaged daily SOFA score ( $P = 0.002$ ) and the averaged daily costs per patient ( $P = 0.032$ )  
251 were shown to have significant effects on the profitability (table 2). Strong effects were found for the  
252 averaged daily SOFA score, which increased profits per case by 1,608€ [CI: 892€, 2,323€] for each  
253 SOFA point. Furthermore, the LOS on the ICU decreased profits per case for 529€ for every day  
254 longer on the ICU. To the best of our knowledge, multivariate regression for economic outcome has  
255 not yet been conducted for these factors. The regression model was performed without the  
256 admission scores for SAPSII, SOFA and APACHEII. When these scores were included, the statistical  
257 significances remained unchanged for the remaining variables that were analyzed (s. table 2).

258 Comparing the cumulative parameters of weaning patients along the years (see table 3), a higher  
259 number of patients weaned as well as a higher average SOFA-score can be associated with a higher  
260 number of median economic result. The observation over time supports the outcome parameters of  
261 table 1. Considering the development since 2012, there is an increase in the number of patients  
262 weaned per year and a decrease in the median hours of ventilation per patient.

263

264

**Table 2 - Multiple linear regression analysis of factors affecting the profit of 583 intensive care patients who underwent the weaning process**

| Variable                 | B (95% CI)            | SE    | P-Value |
|--------------------------|-----------------------|-------|---------|
| Age [y]                  | -16 (-119; 87)        | 52    | 0.765   |
| Gender [m]               | 1,139 (-2,628; 4,906) | 1,918 | 0.553   |
| Quality <sup>1</sup> [%] | 3,732 (-2,457; 9,920) | 3,151 | 0.237   |
| LOS Study-ICU [d]        | -529 (-671; -387)     | 72    | <0.001  |
| LOS Hospital [d]         | -143 (-213; -71)      | 36    | <0.001  |
| Reintubations            | -928 (-2,457; 602)    | 779   | 0.234   |
| Average SOFA             | 1,608 (892; 2,323)    | 364   | <0.001  |
| Daily Costs [€]          | -7.6 (-11; -4)        | 2     | <0.001  |

<sup>1</sup> Quality, Adherence to the quality indicator "Early Weaning from invasive ventilation"

265

266

**Table 3 - Financial demographics in median over time of 583 patients who underwent the weaning process**

| Variable                          | 2012                       | 2013                      | 2014                     | 2015                     | 2016                     | 2017                       |
|-----------------------------------|----------------------------|---------------------------|--------------------------|--------------------------|--------------------------|----------------------------|
| Weaning Patients                  | 65                         | 82                        | 100                      | 114                      | 125                      | 97                         |
| Average SOFA                      | 7.5<br>[5.6; 9.3]          | 8.3<br>[6.7; 11.0]        | 8.2<br>[6.5; 10.1]       | 8.1<br>[6.6; 9.6]        | 8.9<br>[7.0; 10.7]       | 8.3<br>[6.7; 11.0]         |
| Duration of Ventilation [h]       | 660<br>[480; 977]          | 451<br>[230; 667]         | 400<br>[206; 673]        | 439<br>[261; 720]        | 374<br>[239; 602]        | 364<br>[210; 619]          |
| Case-Mix Index <sup>1</sup>       | 22.7<br>[19.1; 30.1]       | 18.0<br>[11.0; 23.9]      | 19.6<br>[11.6; 28.1]     | 18.8<br>[10.9; 23.8]     | 17.7<br>[11.6; 29.1]     | 23.2<br>[13.9; 32.2]       |
| Profits per Case <sup>2</sup> [€] | -12,517<br>[-24,848; -806] | -11,011<br>[-28,547; 999] | -945<br>[-14,141; 8,843] | 390<br>[-11,340; 12,201] | 3,439<br>[-7,494; 8,784] | -3,136<br>[-22,012; 8,284] |

<sup>1</sup>Case-Mix Index, Averaged case-mix per case according to German DRG-System

<sup>2</sup>Averaged financial result per case

267

## 268 DISCUSSION

269 The most important finding was that clinical and economic results were better within the HAG than  
270 the LAG. We sought to evaluate whether adherence above a certain quality threshold leads to a  
271 better economic result per case for the hospital. Our univariate model confirmed our hypothesis that  
272 higher quality leads to better LOS and hospital costs of intensive care patients. However, an  
273 improvement of the quality indicator “early weaning” was not directly associated with a significant  
274 impact on the profitability per case. In the regression model, we were not able to prove that more  
275 quality lead to higher earnings. Instead, significant factors were clinical outcome parameters (LOS  
276 ICU, LOS Hospital and averaged daily SOFA score), which had direct effects on profitability.  
277 Moreover, these parameters were also superior within the HAG, indicating a certain quality effect.  
278 This sequence of effects shows that quality affects the economic results indirectly via clinical  
279 outcome. This means that quality leads to clinical efficiency. Literature already proposes a more  
280 effective use of the costly resource ICU [26]. Thus, from an economic perspective it is recommended  
281 to transfer patients as early as possible from ICU downstream (e.g. intermediate care) since a  
282 prolonged ICU-stay might be inappropriate, dangerous and costly [23,25].

283 Highly specialized ICUs are resource- and cost-intensive and not universally available. By  
284 implementing QM as a method to constantly eliminating the factors of chance, hospitals are trying to  
285 reduce complexity in defining, measuring and learning from QIs. Furthermore, QM is associated as a  
286 necessity for certification processes and therefore incremental part of critical care concepts [1]. The  
287 importance of weaning protocols and according adherence is based on studies that have proven  
288 between 70-80% of all patients receiving >24h invasive ventilation could already be weaned after the  
289 first SBT [8,27,28]. This is why in 2011, a study at our institution investigated that the support of fast  
290 visual feedback for adherence to standard operating procedures within the PDMS led to decreased  
291 duration of mechanical ventilation and higher documentation compliance, supporting our findings  
292 [29]. The approach of measuring and steering quality with indicators carries several direct and  
293 indirect economic incentives. First, less loss per patient due to better clinical outcome has positive  
294 effects on the general economic results of the department. Second, decreased LOS on the ICU gives  
295 room to available beds earlier and therefore other patients to fill in the existing resource [30]. Third,  
296 because of public reporting and potential pay for quality structures, indicators are important  
297 methods for measuring quality and safety in health care, resulting in better outcome [31]. In  
298 particular, transparent quality indicators allow department leaders to identify weak spots and initiate  
299 improvement in a structured and measurable way [2]. Our matched with a study performed in 2008,  
300 showing positive clinical outcome effects of ventilator weaning protocol measures [32]. Patients  
301 spent less time on mechanical ventilation, and thus less time in intensive care and in the hospital. We  
302 found that the more patients that could be weaned per year, the less time they spent on the  
303 ventilator and better the economic results followed, since more patients generating contribution  
304 margins covered fixed costs. This effect shows that redundant capacities can be used for new  
305 admissions and thus higher throughput, similar to a former study at our institution [33].

306 This study is the first to find that high-adherence to the quality indicator “Early weaning from  
307 invasive ventilation” above a proven threshold of 65% showed higher economic returns (or less  
308 losses) than low-adherence. Furthermore, the study is unique in using a case defined data set to  
309 examine the economic effect of a single quality indicator. Current economic prediction models in  
310 intensive care usually describe interventions of entire quality management programs [30] or changes  
311 in staffing [33]. Overall, we found that the median financial return for a hospital is negative when  
312 focusing on weaning from ventilation. This is independent of their QI adherence results. In Germany,  
313 insurance companies reimburse hospitals using the G-DRG System (German Diagnosis Related  
314 Groups System) based on a performance-oriented compensation for inpatients. Within DRG-Systems

1  
2  
3  
4 315 [30], the case-mix of weaning patients does not provide adequate economic incentives for quality  
5 316 based critical care since the reimbursement is mainly focused on duration of ventilation. This is  
6 317 consistent with other studies that found higher process quality led to decreased ventilator  
7 318 dependence and reduced reimbursement [25,26,34]. In this study, we used comprehensive per-  
8 319 patient cost data. At our institution, a case-related cost calculation is well established and highly  
9 320 accurate for reimbursement per case and costs since we have been substantial cost-accounting  
10 321 reference center since the beginning of the G-DRG-system. Therefore, we used this administrative  
11 322 data to calculate the economic outcome per case [35]. In Germany, a representative mix of hospitals  
12 323 gather case-related treatment costs on a yearly basis in order to report them to the Institute for the  
13 324 Hospital Reimbursement System for continuous development [36].

16 325 The results of this study can inform policy makers on the following points: In Germany, the  
17 326 application of quality indicators in critical care is so far not mandatory [12]. Since positive effects of  
18 327 clinical and economic parameters can be found measuring the adherence to only one indicator of the  
19 328 DIVI set (n=10), it is recommended to establish QIs widely. Over the years examined, we found that  
20 329 weaning and the according QI have developed positively as the number of patients receiving weaning  
21 330 increased while the duration of ventilation per patient decreased. The relation between these two  
22 331 parameters shows that the quality of care increased and the organization for the volume effect  
23 332 became more efficient, which is a dominant economic factor according to Nguyen et al. [37].  
24 333 However, in order to evolve further in this direction, intensive care needs adequate reimbursement.  
25 334 Contrary to the majority of ward care, which benefits from shorter length of stay within the flat-  
26 335 compensation system, a decrease in length of stay in intensive care is not rewarded with higher  
27 336 reimbursement. Literature confirms our analyses [36]. This is why we recommend that efforts for  
28 337 quality should be shifted in the center of reimbursement in intensive care for better clinical  
29 338 outcomes, following the approach of valued-based payment (pay for quality), where ICUs are  
30 339 checked upon costs and quality of service [38]. Furthermore, because keeping patients on the ICU  
31 340 and on mechanical ventilation economically-incentivized is proven to be dangerous for the patient  
32 341 [8] and inefficient for the organization [30]. This structural change can ensure the incentives for  
33 342 intensivists to adhere to quality standards instead of collecting ventilation hours. Our argument is  
34 343 supported by a recent publication of a group of experts in intensive care. They argue in favor for a  
35 344 reform in hospital reimbursement, away from flat-compensation towards progressive levels of  
36 345 intensive care. Moreover, they suggest a central planning of all system relevant intensive care  
37 346 infrastructures and according criteria for quality standards [39]. In the end, hospitals benefit from  
38 347 investments in quality, as clinical quality has subsequent effects on economic returns. Thus, not only  
39 348 hospitals, insurance companies and policy makers profit from adherence to quality indicators, also  
40 349 the patient who should be in the center of healthcare does.

#### 47 350 **Unanswered questions and future research**

49 351 As noted previously, the study was conducted in a tertiary university hospital, which is characterized  
50 352 by specific and well established medical processes and structures. A transfer of our observations to  
51 353 other intensive care units is not feasible. Some aspects of our analysis deserve comment on  
52 354 limitation. First, the weaning process has constantly evolved during the years between 2012 and  
53 355 2017. Since the importance of the weaning protocol emerged throughout the years, the focus on  
54 356 measures hereof and according documentation improved over the years as documentation became  
55 357 mandatory at our institution [8]. Furthermore, it was not possible matching the qualifications of  
56 358 staffing as a determinant of adherence to quality and curbing of costs. There is supposed to be a  
57 359 connection between experience and cost awareness [40]. Second, even though indicators and our  
58 360 study-ICU can be examined independently for research purposes, the QI and its progression are  
59 361 substantially connected to other intensive care indicators [19]. For further research, the interactions

1  
2  
3  
4 362 between the QIs and the progression on other ICUs need to be considered. Our results provide a  
5 363 robust assessment of the impact of changes of the quality adherence and robust evaluation of their  
6 364 effects.

## 8 365 **CONCLUSION**

9  
10 366 While the need for critical care increases constantly for various reasons (e.g. demographic change or  
11 367 pandemic crisis), the challenge to provide high quality but cost-effective services will only become  
12 368 more important. We examined a single indicator for quality and found proof that high-adherence to  
13 369 it lead to significantly better clinical outcome. Within the univariate analysis, major clinical  
14 370 parameters were significantly better in the HAG. Furthermore, we showed that adherence for 65% or  
15 371 higher generated significantly higher median earnings within our univariate analysis. However, we  
16 372 also showed that the investigated quality indicator does not significantly affect economic results in  
17 373 our multivariate analysis. Instead, by using clinical parameters as proxies for clinical outcome, they  
18 374 were found to be the main drivers for according economic success. The reason for this is the  
19 375 increased number of patients who could be treated due to more total capacity, when LOS decreased  
20 376 due to higher quality. This is why the focus of this study is not only on reimbursement and on costs,  
21 377 but also on the direct effect of quality on the clinical outcome, which subsequently influences  
22 378 economic results.

23  
24  
25  
26 379 Overall, quality matters for reimbursement, but reimbursement is not adjusted to the costs of  
27 380 providing quality. Since there is no central, structured and timely publication of comparable quality  
28 381 data in Germany, it is difficult for politics and assurances to reimburse on a pay for quality model as  
29 382 the basis for comparisons is missing as not mandatory. Still, as quality in treatment is decisive for the  
30 383 patient's hospital choice and the results of the treatment, QIs will be essential for public information  
31 384 and health economics as the patient decides where to be treated.

32  
33  
34 385  
35  
36  
37  
38  
39  
40  
41  
42  
43  
44  
45  
46  
47  
48  
49  
50  
51  
52  
53  
54  
55  
56  
57  
58  
59  
60

1  
2  
3  
4 386 **Abbreviations**

5 387 QM: Quality management; QI: Quality indicator; DRG: Diagnosis-related groups; ICU: Intensive care  
6 388 unit; PDMS: Patient data management system, LOS: Length of stay; KPI: Key performance indicator;  
7 389 SBT: Spontaneous breathing trial; SOFA: Sequential organ failure assessment; APACHEII: Acute  
8 390 physiology and chronic health evaluation II; SAPS II: Simplified acute physiology score; Average SOFA:  
9 391 Averaged daily SOFA score; PACU: Post-acute care unit; OT: Operating theatre; CI: Confidence  
10 392 interval.

11  
12  
13 393 **Author contributions:**

14  
15 394 FB perceived the idea. RA and AZ performed data collection. AZ conducted statistical analysis;  
16 395 drafted the manuscript and shared responsibility for design, coordination and finalization of the  
17 396 manuscript; contributed to interpretation of the data, and had full access to the data. OK consulted  
18 397 in quality management, QI and ICU therapy. All other critically reviewed and advised with their  
19 398 expertise on the manuscript.

20  
21  
22 399 **Funding:** This research received no specific grant from any funding agency in the public, commercial  
23 400 or not-for-profit sectors. This analysis is part of a quality improvement effort from the Department of  
24 401 Anesthesiology and Operative Intensive Care Medicine of the Charité Universitätsmedizin – Berlin,  
25 402 Campus Mitte and Virchow-Klinikum.

26  
27 403 **Patient Consent:** Not required.

28  
29 404 **Competing interests:** The authors declare that they have no competing interests related to this  
30 405 article. ICJME forms have been submitted to the editorial office.

31  
32 406 AZ has nothing to declare. Dr. Kumpf has nothing to disclose. CS reports grants from Aridis  
33 407 Pharmaceutical Inc., grants from B. Braun Melsungen AG, grants from Drägerwerk AG & Co. KGaA,  
34 408 grants from Deutsche Forschungsgemeinschaft / German Research Society, grants from Deutsches  
35 409 Zentrum für Luft- und Raumfahrt e. V. (DLR) / German Aerospace Center, grants from Einstein  
36 410 Stiftung Berlin / Einstein Foundation Berlin, grants from European Society of Anaesthesiology, grants  
37 411 from Gemeinsamer Bundesausschuss / Federal Joint Committee (G-BA), grants from  
38 412 Inneruniversitäre Forschungsförderung / Inner University Grants, grants from Projektträger im DLR /  
39 413 Project Management Agency, grants from Stifterverband / Non-Profit Society Promoting Science and  
40 414 Education, grants from WHOCC, grants from Baxter Deutschland GmbH, grants from Cytosorbents  
41 415 Europe GmbH, grants from Edwards Lifesciences Germany GmbH, grants from Fresenius Medical  
42 416 Care, grants from Grünenthal GmbH, grants from Masimo Europe Ltd., grants from Pfizer Pharma PFE  
43 417 GmbH, personal fees from Georg Thieme Verlag, grants from Dr. F. Köhler Chemie GmbH, grants  
44 418 from Sintetica GmbH, grants from European Commission, grants from Stifterverband für die deutsche  
45 419 Wissenschaft e.V. / Philips, grants from Stiftung Charité, grants from AGUETTANT Deutschland  
46 420 GmbH, grants from AbbVie Deutschland GmbH & Co. KG, grants from Amomed Pharma GmbH,  
47 421 grants from InTouch Health, grants from Copra System GmbH, grants from Correvio GmbH, grants  
48 422 from Max-Planck-Gesellschaft zur Förderung der Wissenschaften e.V., grants from Deutsche  
49 423 Gesellschaft für Anästhesiologie & Intensivmedizin (DGAI), grants from Stifterverband für die  
50 424 deutsche Wissenschaft e.V. / Medtronic, grants from Philips Electronics Nederland BV, grants from  
51 425 BMH, outside the submitted work; In addition, Prof. Spies has a patent 10 2014 215 211.9 licensed, a  
52 426 patent 10 2014 215 212.9 licensed, a patent 10 2018 114 364.8 licensed, and a patent 10 2018 110  
53 427 275.5 licensed. MH has nothing to disclose. MD has nothing to disclose. RA has nothing to disclose. JK  
54 428 has nothing to disclose. RJ has nothing to disclose. FB reports grants from Einstein Foundation,  
55 429 personal fees from Axon Publishing, grants from Vifor Pharma, personal fees from Elsevier



1  
2  
3  
4 430 Publishing, grants from Federal Ministry of Health, Germany, grants from Berlin Institute of Health,  
5 431 outside the submitted work.

6  
7 432 **Research Ethics Approval:** The study was approved by the written consent of the Ethics Commission  
8 433 – Charité – Universitätsmedizin Berlin (EA2/139/20). The need for patient’s consent was waived due  
9 434 to the retrospective nature of the study.

10  
11 435 **Data Availability Statement:** The datasets analyzed during the current study are available from the  
12 436 corresponding author on reasonable request.

13  
14 437 **Clinical Trial Registration:** Not applicable.

15  
16 438 **Patient and Public Involvement statement:** Patients and the public were not directly involved in this  
17 439 observational study.

18  
19 440  
20  
21  
22  
23  
24  
25  
26  
27  
28  
29  
30  
31  
32  
33  
34  
35  
36  
37  
38  
39  
40  
41  
42  
43  
44  
45  
46  
47  
48  
49  
50  
51  
52  
53  
54  
55  
56  
57  
58  
59  
60

For peer review only

441 **References**

- 442 1 Holtel M, Rossmuller T, Frommhold K. [Quality Management in Medicine: What the Surgeon  
443 Needs to Know]. *Zentralbl Chir* 2016;**141**:583–90. doi:10.1055/s-0035-1557892
- 444 2 Magunia P, Keller M, Rhode A. [Effects of quality-oriented remuneration]. *Unfallchirurg*  
445 2016;**119**:454–6. doi:10.1007/s00113-016-0172-6
- 446 3 Busse R, Geissler A, Aaviksoo A, *et al.* Diagnosis related groups in Europe: moving towards  
447 transparency, efficiency, and quality in hospitals? *BMJ* 2013;**346**:f3197.
- 448 4 Martin J, Neurohr C, Bauer M, *et al.* [Cost of intensive care in a German hospital: cost-unit  
449 accounting based on the InEK matrix]. *Anaesthetist* 2008;**57**:505–12. doi:10.1007/s00101-  
450 008-1353-7
- 451 5 Cooper LM, Linde-Zwirble WT. Medicare intensive care unit use: analysis of incidence, cost,  
452 and payment. *Crit Care Med* 2004;**32**:2247–53.
- 453 6 Funk G-C, Anders S, Breyer M-K, *et al.* Incidence and outcome of weaning from mechanical  
454 ventilation according to new categories. *Eur Respir J* 2010;**35**:88–94.  
455 doi:10.1183/09031936.00056909
- 456 7 Cox CE, Carson SS, Govert JA, *et al.* An economic evaluation of prolonged mechanical  
457 ventilation. *Crit Care Med* 2007;**35**:1918–27. doi:10.1097/01.CCM.0000275391.35834.10
- 458 8 Deutsche Gesellschaft für Anästhesiologie & Intensivmedizin. S3-Leitlinie Invasive Beatmung  
459 und Einsatz extrakorporaler Verfahren bei akuter respiratorischer Insuffizienz, Langversion,  
460 Stand 04.12.2017. 2017.www.intensivmedizin-leipzig.de (accessed 21 Nov 2018).
- 461 9 Ely EW, Baker AM, Dunagan DP, *et al.* Effect on the duration of mechanical ventilation of  
462 identifying patients capable of breathing spontaneously. *N Engl J Med* 1996;**335**:1864–9.  
463 doi:10.1056/NEJM199612193352502
- 464 10 Pham T, Brochard LJ, Slutsky AS. Mechanical Ventilation: State of the Art. *Mayo Clin Proc*  
465 2017;**92**:1382–400. doi:10.1016/j.mayocp.2017.05.004
- 466 11 Cohen IL, Booth F V. Cost containment and mechanical ventilation in the United States. *New*  
467 *Horiz* 1994;**2**:283–90.
- 468 12 Kumpf O. [Quality indicators in intensive care medicine : Background and practical use]. *Med*  
469 *Klin Intensivmed Notfmed* Published Online First: December 2019. doi:10.1007/s00063-019-  
470 00630-w
- 471 13 Ihra GC, Lehberger J, Hochrieser H, *et al.* Development of demographics and outcome of very  
472 old critically ill patients admitted to intensive care units. *Intensive Care Med* 2012;**38**:620–6.  
473 doi:10.1007/s00134-012-2474-7
- 474 14 Schönhofer B, Geiseler J, Pfeifer M, *et al.* [WeanNet: The network of weaning units of the DGP  
475 (Deutsche Gesellschaft für Pneumologie und Beatmungsmedizin) - results to epidemiology an  
476 outcome in patients with prolonged weaning]. *Dtsch Med Wochenschr* 2016;**141**:e166-72.  
477 doi:10.1055/s-0042-112345
- 478 15 Navalesi P, Frigerio P, Patzlaff A, *et al.* Prolonged weaning: from the intensive care unit to  
479 home. *Rev Port Pneumol* 2014;**20**:264–72. doi:10.1016/j.rppneu.2014.04.006
- 480 16 Braun J-P, Bause H, Bloos F, *et al.* Peer reviewing critical care: a pragmatic approach to quality  
481 management. *Ger Med Sci* 2010;**8**:Doc23. doi:10.3205/000112
- 482 17 Bundesministerium für Gesundheit. Qualitätssicherung im Krankenhausbereich. 2018;:2016–

- 1  
2  
3  
4 483 7. <https://www.bundesgesundheitsministerium.de/qualitaet-krankenhausversorgung.html>  
5 484 (accessed 3 Sep 2018).  
6  
7 485 18 Brinkmann A, Braun JP, Riessen R, *et al.* [Quality assurance concepts in intensive care  
8 486 medicine]. *Med Klin Intensivmed Notfmed* 2015;**110**:575-580,582-583. doi:10.1007/s00063-  
9 487 015-0095-y  
10  
11 488 19 Kumpf O, Braun J-P, Brinkmann A, *et al.* Quality indicators in intensive care medicine for  
12 489 Germany - third edition 2017. *Ger Med Sci* 2017;**15**:Doc10. doi:10.3205/000251  
13  
14 490 20 Sogaard R, Enemark U. The cost-quality relationship in European hospitals: a systematic  
15 491 review. *J Health Serv Res Policy* 2017;**22**:126–33. doi:10.1177/1355819616682283  
16  
17 492 21 Donabedian A. The role of outcomes in quality assessment and assurance. *QRB Qual Rev Bull*  
18 493 1992;**18**:356–60.  
19  
20 494 22 Spies C, Kastrup M, Kerner T *et al.* *SOPs in Anästhesiologie und Schmerztherapie*. Thieme  
21 495 2013. doi:10.1055/b-002-57140  
22  
23 496 23 Kastrup M, von Dossow V, Seeling M, *et al.* Key performance indicators in intensive care  
24 497 medicine. A retrospective matched cohort study. *J Int Med Res* 2009;**37**:1267–84.  
25 498 doi:10.1177/147323000903700502  
26  
27 499 24 Fadila M, Regunath H. *Ventilator Weaning*. Treasure Island (FL): 2018.  
28  
29 500 25 Nachtigall I, Tamarkin A, Tafelski S, *et al.* Impact of adherence to standard operating  
30 501 procedures for pneumonia on outcome of intensive care unit patients. *Crit Care Med*  
31 502 2009;**37**:159–66. doi:10.1097/CCM.0b013e3181934f1b  
32  
33 503 26 Rapoport J, Teres D, Zhao Y, *et al.* Length of stay data as a guide to hospital economic  
34 504 performance for ICU patients. *Med Care* 2003;**41**:386–97.  
35 505 doi:10.1097/01.MLR.0000053021.93198.96  
36  
37 506 27 Brochard L, Rauss A, Benito S, *et al.* Comparison of three methods of gradual withdrawal from  
38 507 ventilatory support during weaning from mechanical ventilation. *Am J Respir Crit Care Med*  
39 508 1994;**150**:896–903. doi:10.1164/ajrccm.150.4.7921460  
40  
41 509 28 Vitacca M, Vianello A, Colombo D, *et al.* Comparison of two methods for weaning patients  
42 510 with chronic obstructive pulmonary disease requiring mechanical ventilation for more than 15  
43 511 days. *Am J Respir Crit Care Med* 2001;**164**:225–30. doi:10.1164/ajrccm.164.2.2008160  
44  
45 512 29 Kastrup M, Nolting MJ, Ahlborn R, *et al.* An electronic tool for visual feedback to monitor the  
46 513 adherence to quality indicators in intensive care medicine. *J Int Med Res* 2011;**39**:2187–200.  
47 514 doi:10.1177/147323001103900615  
48  
49 515 30 Smyrnios NA, Connolly A, Wilson MM, *et al.* Effects of a multifaceted, multidisciplinary,  
50 516 hospital-wide quality improvement program on weaning from mechanical ventilation. *Crit*  
51 517 *Care Med* 2002;**30**:1224–30. doi:10.1097/00003246-200206000-00009  
52  
53 518 31 Lindenauer PK, Remus D, Roman S, *et al.* Public reporting and pay for performance in hospital  
54 519 quality improvement. *N Engl J Med* 2007;**356**:486–96. doi:10.1056/NEJMsa064964  
55  
56 520 32 Girard TD, Kress JP, Fuchs BD, *et al.* Efficacy and safety of a paired sedation and ventilator  
57 521 weaning protocol for mechanically ventilated patients in intensive care (Awakening and  
58 522 Breathing Controlled trial): a randomised controlled trial. *Lancet (London, England)*  
59 523 2008;**371**:126–34. doi:10.1016/S0140-6736(08)60105-1  
60  
524 33 Kastrup M, Seeling M, Barthel S, *et al.* Effects of intensivist coverage in a post-anaesthesia  
525 care unit on surgical patients' case mix and characteristics of the intensive care unit. *Crit Care*

- 1  
2  
3  
4 526 2012;**16**:R126. doi:10.1186/cc11428
- 5 527 34 Soo Hoo GW, Wen YE, Nguyen T V, *et al.* Impact of clinical guidelines in the management of  
6 528 severe hospital-acquired pneumonia. *Chest* 2005;**128**:2778–87. doi:10.1378/chest.128.4.2778
- 8 529 35 InEK GmbH. Kalkulation von Behandlungskosten. 2016. [https://www.g-](https://www.g-drg.de/Kalkulation2/DRG-Fallpauschalen_17b_KHG/Kalkulationshandbuch)  
9 530 [drg.de/Kalkulation2/DRG-Fallpauschalen\\_17b\\_KHG/Kalkulationshandbuch](https://www.g-drg.de/Kalkulation2/DRG-Fallpauschalen_17b_KHG/Kalkulationshandbuch)
- 11 531 36 Riessen R, Hermes C, Bodmann K-F, *et al.* [Reimbursement of intensive care services in the  
12 532 German DRG system : Current problems and possible solutions]. *Med Klin Intensivmed*  
13 533 *Notfmed* 2018;**113**:13–23. doi:10.1007/s00063-017-0390-x
- 15 534 37 Nguyen Y-L, Wallace DJ, Yordanov Y, *et al.* The Volume-Outcome Relationship in Critical Care:  
16 535 A Systematic Review and Meta-analysis. *Chest* 2015;**148**:79–92. doi:10.1378/chest.14-2195
- 18 536 38 Blumenthal D, Abrams MK. Tailoring Complex Care Management for High-Need, High-Cost  
19 537 Patients. *JAMA* 2016;**316**:1657–8. doi:10.1001/jama.2016.12388
- 21 538 39 Riessen R, Markewitz A, Grigoleit M, *et al.* [Discussion paper for a hospital financing reform in  
22 539 Germany from the perspective of intensive care medicine]. *Med Klin Intensivmed Notfmed*  
23 540 2020;**115**:59–66. doi:10.1007/s00063-019-00629-3
- 25 541 40 Wunsch H, Gershengorn H, Scales DC. Economics of ICU organization and management. *Crit*  
26 542 *Care Clin* 2012;**28**:25–37, v. doi:10.1016/j.ccc.2011.09.004

28 543

30 544

1  
2  
3  
4  
5  
6  
7  
8  
9  
10  
11  
12  
13  
14  
15  
16  
17  
18  
19  
20  
21  
22  
23  
24  
25  
26  
27  
28  
29  
30  
31  
32  
33  
34  
35  
36  
37  
38  
39  
40  
41  
42  
43  
44  
45  
46  
47  
48  
49  
50  
51  
52  
53  
54  
55  
56  
57  
58  
59  
60

545 **Figure Legend:**

546 Figure 1 Patient Inclusion and Exclusion Criteria. Flowchart of the process used in the present study  
547 for patient record inclusion. Numbers listed are number of patients in each group

For peer review only

1  
2  
3  
4  
5  
6  
7  
8  
9  
10  
11  
12  
13  
14  
15  
16  
17  
18  
19  
20  
21  
22  
23  
24  
25  
26  
27  
28  
29  
30  
31  
32  
33  
34  
35  
36  
37  
38  
39  
40  
41

Consecutive patients  
included (n=3,063), admitted between  
Jan. 2012 and Dec. 2017 to Study-ICU

<18 years (n=29)

Duration of ventilation on ICU below 95 hours (n=975)

Receiving no invasive ventilation OR no ventilation (n=747)

Status „Do-Not-Reanimate“ OR „Do-Not-Resuscitate“ OR „Do not  
Escalate“ OR „Organ Donation“ (no KPIs documented) OR „Therapy  
Freeze“ (n=68)

Admission to Hospital before 2012 OR Discharge from  
hospital after 2017 (n=19)

Incomplete electronic patient record (Incomplete data) (n=71)

No status of „Ready to wean“ (n=571)

Included Patients (n=583)

## CHEERS Checklist

### Items to include when reporting economic evaluations of health interventions

The **ISPOR CHEERS Task Force Report**, *Consolidated Health Economic Evaluation Reporting Standards (CHEERS)—Explanation and Elaboration: A Report of the ISPOR Health Economic Evaluations Publication Guidelines Good Reporting Practices Task Force*, provides examples and further discussion of the 24-item CHEERS Checklist and the CHEERS Statement. It may be accessed via the *Value in Health* or via the ISPOR Health Economic Evaluation Publication Guidelines – CHEERS: Good Reporting Practices webpage: <http://www.ispor.org/TaskForces/EconomicPubGuidelines.asp>

| Section/item                    | Item No | Recommendation                                                                                                                                                                             | Reported on page No/line No |
|---------------------------------|---------|--------------------------------------------------------------------------------------------------------------------------------------------------------------------------------------------|-----------------------------|
| <b>Title and abstract</b>       |         |                                                                                                                                                                                            |                             |
| Title                           | 1       | Identify the study as an economic evaluation or use more specific terms such as “cost-effectiveness analysis”, and describe the interventions compared.                                    | _____                       |
| Abstract                        | 2       | Provide a structured summary of objectives, perspective, setting, methods (including study design and inputs), results (including base case and uncertainty analyses), and conclusions.    | _____                       |
| <b>Introduction</b>             |         |                                                                                                                                                                                            |                             |
| Background and objectives       | 3       | Provide an explicit statement of the broader context for the study.<br>Present the study question and its relevance for health policy or practice decisions.                               | _____                       |
| <b>Methods</b>                  |         |                                                                                                                                                                                            |                             |
| Target population and subgroups | 4       | Describe characteristics of the base case population and subgroups analysed, including why they were chosen.                                                                               | _____                       |
| Setting and location            | 5       | State relevant aspects of the system(s) in which the decision(s) need(s) to be made.                                                                                                       | _____                       |
| Study perspective               | 6       | Describe the perspective of the study and relate this to the costs being evaluated.                                                                                                        | _____                       |
| Comparators                     | 7       | Describe the interventions or strategies being compared and state why they were chosen.                                                                                                    | _____                       |
| Time horizon                    | 8       | State the time horizon(s) over which costs and consequences are being evaluated and say why appropriate.                                                                                   | _____                       |
| Discount rate                   | 9       | Report the choice of discount rate(s) used for costs and outcomes and say why appropriate.                                                                                                 | _____                       |
| Choice of health outcomes       | 10      | Describe what outcomes were used as the measure(s) of benefit in the evaluation and their relevance for the type of analysis performed.                                                    | _____                       |
| Measurement of effectiveness    | 11a     | <i>Single study-based estimates:</i> Describe fully the design features of the single effectiveness study and why the single study was a sufficient source of clinical effectiveness data. | _____                       |

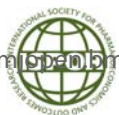

|    |                         |     |                                                                                                                                                                                                                                                                                                                                                       |       |
|----|-------------------------|-----|-------------------------------------------------------------------------------------------------------------------------------------------------------------------------------------------------------------------------------------------------------------------------------------------------------------------------------------------------------|-------|
| 1  |                         |     |                                                                                                                                                                                                                                                                                                                                                       |       |
| 2  |                         | 11b | <i>Synthesis-based estimates:</i> Describe fully the methods used for identification of included studies and synthesis of clinical effectiveness data.                                                                                                                                                                                                | <hr/> |
| 3  |                         |     |                                                                                                                                                                                                                                                                                                                                                       |       |
| 4  | Measurement and         |     |                                                                                                                                                                                                                                                                                                                                                       |       |
| 5  | valuation of preference | 12  | If applicable, describe the population and methods used to elicit preferences for outcomes.                                                                                                                                                                                                                                                           | <hr/> |
| 6  | based outcomes          |     |                                                                                                                                                                                                                                                                                                                                                       |       |
| 7  |                         |     |                                                                                                                                                                                                                                                                                                                                                       |       |
| 8  | Estimating resources    | 13a | <i>Single study-based economic evaluation:</i> Describe approaches used to estimate resource use associated with the alternative interventions. Describe primary or secondary research methods for valuing each resource item in terms of its unit cost. Describe any adjustments made to approximate to opportunity costs.                           | <hr/> |
| 9  | and costs               |     |                                                                                                                                                                                                                                                                                                                                                       |       |
| 10 |                         |     |                                                                                                                                                                                                                                                                                                                                                       |       |
| 11 |                         |     |                                                                                                                                                                                                                                                                                                                                                       |       |
| 12 |                         |     |                                                                                                                                                                                                                                                                                                                                                       |       |
| 13 |                         |     |                                                                                                                                                                                                                                                                                                                                                       |       |
| 14 |                         |     |                                                                                                                                                                                                                                                                                                                                                       |       |
| 15 |                         | 13b | <i>Model-based economic evaluation:</i> Describe approaches and data sources used to estimate resource use associated with model health states. Describe primary or secondary research methods for valuing each resource item in terms of its unit cost. Describe any adjustments made to approximate to opportunity costs.                           | <hr/> |
| 16 |                         |     |                                                                                                                                                                                                                                                                                                                                                       |       |
| 17 |                         |     |                                                                                                                                                                                                                                                                                                                                                       |       |
| 18 |                         |     |                                                                                                                                                                                                                                                                                                                                                       |       |
| 19 |                         |     |                                                                                                                                                                                                                                                                                                                                                       |       |
| 20 |                         |     |                                                                                                                                                                                                                                                                                                                                                       |       |
| 21 |                         |     |                                                                                                                                                                                                                                                                                                                                                       |       |
| 22 | Currency, price date,   | 14  | Report the dates of the estimated resource quantities and unit costs. Describe methods for adjusting estimated unit costs to the year of reported costs if necessary. Describe methods for converting costs into a common currency base and the exchange rate.                                                                                        | <hr/> |
| 23 | and conversion          |     |                                                                                                                                                                                                                                                                                                                                                       |       |
| 24 |                         |     |                                                                                                                                                                                                                                                                                                                                                       |       |
| 25 |                         |     |                                                                                                                                                                                                                                                                                                                                                       |       |
| 26 |                         |     |                                                                                                                                                                                                                                                                                                                                                       |       |
| 27 |                         |     |                                                                                                                                                                                                                                                                                                                                                       |       |
| 28 | Choice of model         | 15  | Describe and give reasons for the specific type of decision-analytical model used. Providing a figure to show model structure is strongly recommended.                                                                                                                                                                                                | <hr/> |
| 29 |                         |     |                                                                                                                                                                                                                                                                                                                                                       |       |
| 30 |                         |     |                                                                                                                                                                                                                                                                                                                                                       |       |
| 31 | Assumptions             | 16  | Describe all structural or other assumptions underpinning the decision-analytical model.                                                                                                                                                                                                                                                              | <hr/> |
| 32 |                         |     |                                                                                                                                                                                                                                                                                                                                                       |       |
| 33 |                         |     |                                                                                                                                                                                                                                                                                                                                                       |       |
| 34 | Analytical methods      | 17  | Describe all analytical methods supporting the evaluation. This could include methods for dealing with skewed, missing, or censored data; extrapolation methods; methods for pooling data; approaches to validate or make adjustments (such as half cycle corrections) to a model; and methods for handling population heterogeneity and uncertainty. | <hr/> |
| 35 |                         |     |                                                                                                                                                                                                                                                                                                                                                       |       |
| 36 |                         |     |                                                                                                                                                                                                                                                                                                                                                       |       |
| 37 |                         |     |                                                                                                                                                                                                                                                                                                                                                       |       |
| 38 |                         |     |                                                                                                                                                                                                                                                                                                                                                       |       |
| 39 |                         |     |                                                                                                                                                                                                                                                                                                                                                       |       |
| 40 |                         |     |                                                                                                                                                                                                                                                                                                                                                       |       |
| 41 |                         |     |                                                                                                                                                                                                                                                                                                                                                       |       |
| 42 | <b>Results</b>          |     |                                                                                                                                                                                                                                                                                                                                                       |       |
| 43 | Study parameters        | 18  | Report the values, ranges, references, and, if used, probability distributions for all parameters. Report reasons or sources for distributions used to represent uncertainty where appropriate. Providing a table to show the input values is strongly recommended.                                                                                   | <hr/> |
| 44 |                         |     |                                                                                                                                                                                                                                                                                                                                                       |       |
| 45 |                         |     |                                                                                                                                                                                                                                                                                                                                                       |       |
| 46 |                         |     |                                                                                                                                                                                                                                                                                                                                                       |       |
| 47 |                         |     |                                                                                                                                                                                                                                                                                                                                                       |       |
| 48 |                         |     |                                                                                                                                                                                                                                                                                                                                                       |       |
| 49 | Incremental costs and   | 19  | For each intervention, report mean values for the main categories of estimated costs and outcomes of interest, as well as mean differences between the comparator groups. If applicable, report incremental cost-effectiveness ratios.                                                                                                                | <hr/> |
| 50 | outcomes                |     |                                                                                                                                                                                                                                                                                                                                                       |       |
| 51 |                         |     |                                                                                                                                                                                                                                                                                                                                                       |       |
| 52 |                         |     |                                                                                                                                                                                                                                                                                                                                                       |       |
| 53 | Characterising          | 20a | <i>Single study-based economic evaluation:</i> Describe the effects of sampling uncertainty for the estimated incremental cost and incremental effectiveness parameters, together with the impact                                                                                                                                                     | <hr/> |
| 54 | uncertainty             |     |                                                                                                                                                                                                                                                                                                                                                       |       |
| 55 |                         |     |                                                                                                                                                                                                                                                                                                                                                       |       |
| 56 |                         |     |                                                                                                                                                                                                                                                                                                                                                       |       |
| 57 |                         |     |                                                                                                                                                                                                                                                                                                                                                       |       |
| 58 |                         |     |                                                                                                                                                                                                                                                                                                                                                       |       |
| 59 |                         |     |                                                                                                                                                                                                                                                                                                                                                       |       |
| 60 |                         |     |                                                                                                                                                                                                                                                                                                                                                       |       |



|    |                       |     |                                                                      |  |
|----|-----------------------|-----|----------------------------------------------------------------------|--|
| 1  |                       |     | of methodological assumptions (such as discount rate, study          |  |
| 2  |                       |     | perspective).                                                        |  |
| 3  |                       | 20b | <i>Model-based economic evaluation</i> : Describe the effects on the |  |
| 4  |                       |     | results of uncertainty for all input parameters, and uncertainty     |  |
| 5  |                       |     | related to the structure of the model and assumptions.               |  |
| 6  |                       |     |                                                                      |  |
| 7  | Characterising        | 21  | If applicable, report differences in costs, outcomes, or cost-       |  |
| 8  | heterogeneity         |     | effectiveness that can be explained by variations between            |  |
| 9  |                       |     | subgroups of patients with different baseline characteristics or     |  |
| 10 |                       |     | other observed variability in effects that are not reducible by      |  |
| 11 |                       |     | more information.                                                    |  |
| 12 |                       |     |                                                                      |  |
| 13 | <b>Discussion</b>     |     |                                                                      |  |
| 14 | Study findings,       | 22  | Summarise key study findings and describe how they support           |  |
| 15 | limitations,          |     | the conclusions reached. Discuss limitations and the                 |  |
| 16 | generalisability, and |     | generalisability of the findings and how the findings fit with       |  |
| 17 | current knowledge     |     | current knowledge.                                                   |  |
| 18 |                       |     |                                                                      |  |
| 19 | <b>Other</b>          |     |                                                                      |  |
| 20 | Source of funding     | 23  | Describe how the study was funded and the role of the funder         |  |
| 21 |                       |     | in the identification, design, conduct, and reporting of the         |  |
| 22 |                       |     | analysis. Describe other non-monetary sources of support.            |  |
| 23 |                       |     |                                                                      |  |
| 24 | Conflicts of interest | 24  | Describe any potential for conflict of interest of study             |  |
| 25 |                       |     | contributors in accordance with journal policy. In the absence       |  |
| 26 |                       |     | of a journal policy, we recommend authors comply with                |  |
| 27 |                       |     | International Committee of Medical Journal Editors                   |  |
| 28 |                       |     | recommendations.                                                     |  |
| 29 |                       |     |                                                                      |  |

For consistency, the CHEERS Statement checklist format is based on the format of the CONSORT statement checklist

The **ISPOR CHEERS Task Force Report** provides examples and further discussion of the 24-item CHEERS Checklist and the CHEERS Statement. It may be accessed via the *Value in Health* link or via the ISPOR Health Economic Evaluation Publication Guidelines – CHEERS: Good Reporting Practices webpage: <http://www.ispor.org/TaskForces/EconomicPubGuidelines.asp>

The citation for the CHEERS Task Force Report is:

Husereau D, Drummond M, Petrou S, et al. Consolidated health economic evaluation reporting standards (CHEERS)—Explanation and elaboration: A report of the ISPOR health economic evaluations publication guidelines good reporting practices task force. *Value Health* 2013;16:231-50.



# Reporting checklist for economic evaluation of health interventions.

Based on the CHEERS guidelines.

|                                 | Reporting Item                                                                                                                                                                                            | Page Number |
|---------------------------------|-----------------------------------------------------------------------------------------------------------------------------------------------------------------------------------------------------------|-------------|
| <b>Title</b>                    |                                                                                                                                                                                                           |             |
|                                 | <a href="#">#1</a> Identify the study as an economic evaluation or use more specific terms such as “cost-effectiveness analysis”, and describe the interventions compared.                                | 1           |
| <b>Abstract</b>                 |                                                                                                                                                                                                           |             |
|                                 | <a href="#">#2</a> Provide a structured summary of objectives, perspective, setting, methods (including study design and inputs), results (including base case and uncertainty analyses), and conclusions | 2           |
| <b>Introduction</b>             |                                                                                                                                                                                                           |             |
| Background and objectives       | <a href="#">#3</a> Provide an explicit statement of the broader context for the study. Present the study question and its relevance for health policy or practice decisions                               | 3           |
| <b>Methods</b>                  |                                                                                                                                                                                                           |             |
| Target population and subgroups | <a href="#">#4</a> Describe characteristics of the base case population and subgroups analysed, including why they were chosen.                                                                           | 4           |
| Setting and location            | <a href="#">#5</a> State relevant aspects of the system(s) in which the decision(s) need(s) to be made.                                                                                                   | 4           |
| Study perspective               | <a href="#">#6</a> Describe the perspective of the study and relate this to the costs being evaluated.                                                                                                    | 4           |
| Comparators                     | <a href="#">#7</a> Describe the interventions or strategies being compared and state why they were chosen.                                                                                                | 5           |

|    |                                                        |                      |                                                                                                                                                                                                                                                                                                                     |     |
|----|--------------------------------------------------------|----------------------|---------------------------------------------------------------------------------------------------------------------------------------------------------------------------------------------------------------------------------------------------------------------------------------------------------------------|-----|
| 1  | Time horizon                                           | <a href="#">#8</a>   | State the time horizon(s) over which costs and consequences are being evaluated and say why appropriate.                                                                                                                                                                                                            | 4   |
| 2  |                                                        |                      |                                                                                                                                                                                                                                                                                                                     |     |
| 3  |                                                        |                      |                                                                                                                                                                                                                                                                                                                     |     |
| 4  |                                                        |                      |                                                                                                                                                                                                                                                                                                                     |     |
| 5  |                                                        |                      |                                                                                                                                                                                                                                                                                                                     |     |
| 6  | Discount rate                                          | <a href="#">#9</a>   | Report the choice of discount rate(s) used for costs and outcomes and say why appropriate                                                                                                                                                                                                                           | 5   |
| 7  |                                                        |                      |                                                                                                                                                                                                                                                                                                                     |     |
| 8  |                                                        |                      |                                                                                                                                                                                                                                                                                                                     |     |
| 9  |                                                        |                      |                                                                                                                                                                                                                                                                                                                     |     |
| 10 | Choice of health outcomes                              | <a href="#">#10</a>  | Describe what outcomes were used as the measure(s) of benefit in the evaluation and their relevance for the type of analysis performed                                                                                                                                                                              | 6   |
| 11 |                                                        |                      |                                                                                                                                                                                                                                                                                                                     |     |
| 12 |                                                        |                      |                                                                                                                                                                                                                                                                                                                     |     |
| 13 |                                                        |                      |                                                                                                                                                                                                                                                                                                                     |     |
| 14 |                                                        |                      |                                                                                                                                                                                                                                                                                                                     |     |
| 15 | Measurement of effectiveness                           | <a href="#">#11a</a> | Single study-based estimates: Describe fully the design features of the single effectiveness study and why the single study was a sufficient source of clinical effectiveness data                                                                                                                                  | 4   |
| 16 |                                                        |                      |                                                                                                                                                                                                                                                                                                                     |     |
| 17 |                                                        |                      |                                                                                                                                                                                                                                                                                                                     |     |
| 18 |                                                        |                      |                                                                                                                                                                                                                                                                                                                     |     |
| 19 |                                                        |                      |                                                                                                                                                                                                                                                                                                                     |     |
| 20 |                                                        |                      |                                                                                                                                                                                                                                                                                                                     |     |
| 21 |                                                        |                      |                                                                                                                                                                                                                                                                                                                     |     |
| 22 | Measurement of effectiveness                           | <a href="#">#11b</a> | Synthesis-based estimates: Describe fully the methods used for identification of included studies and synthesis of clinical effectiveness data                                                                                                                                                                      | 5   |
| 23 |                                                        |                      |                                                                                                                                                                                                                                                                                                                     |     |
| 24 |                                                        |                      |                                                                                                                                                                                                                                                                                                                     |     |
| 25 |                                                        |                      |                                                                                                                                                                                                                                                                                                                     |     |
| 26 |                                                        |                      |                                                                                                                                                                                                                                                                                                                     |     |
| 27 | Measurement and valuation of preference based outcomes | <a href="#">#12</a>  | If applicable, describe the population and methods used to elicit preferences for outcomes.                                                                                                                                                                                                                         | n/a |
| 28 |                                                        |                      |                                                                                                                                                                                                                                                                                                                     |     |
| 29 |                                                        |                      |                                                                                                                                                                                                                                                                                                                     |     |
| 30 |                                                        |                      |                                                                                                                                                                                                                                                                                                                     |     |
| 31 |                                                        |                      |                                                                                                                                                                                                                                                                                                                     |     |
| 32 |                                                        |                      |                                                                                                                                                                                                                                                                                                                     |     |
| 33 |                                                        |                      |                                                                                                                                                                                                                                                                                                                     |     |
| 34 | **Estimating resources and costs **                    |                      |                                                                                                                                                                                                                                                                                                                     |     |
| 35 |                                                        |                      |                                                                                                                                                                                                                                                                                                                     |     |
| 36 |                                                        |                      |                                                                                                                                                                                                                                                                                                                     |     |
| 37 |                                                        |                      |                                                                                                                                                                                                                                                                                                                     |     |
| 38 |                                                        |                      |                                                                                                                                                                                                                                                                                                                     |     |
| 39 |                                                        |                      |                                                                                                                                                                                                                                                                                                                     |     |
| 40 |                                                        | <a href="#">#13a</a> | Single study-based economic evaluation: Describe approaches used to estimate resource use associated with the alternative interventions. Describe primary or secondary research methods for valuing each resource item in terms of its unit cost. Describe any adjustments made to approximate to opportunity costs | 6   |
| 41 |                                                        |                      |                                                                                                                                                                                                                                                                                                                     |     |
| 42 |                                                        |                      |                                                                                                                                                                                                                                                                                                                     |     |
| 43 |                                                        |                      |                                                                                                                                                                                                                                                                                                                     |     |
| 44 |                                                        |                      |                                                                                                                                                                                                                                                                                                                     |     |
| 45 |                                                        |                      |                                                                                                                                                                                                                                                                                                                     |     |
| 46 |                                                        |                      |                                                                                                                                                                                                                                                                                                                     |     |
| 47 |                                                        |                      |                                                                                                                                                                                                                                                                                                                     |     |
| 48 |                                                        |                      |                                                                                                                                                                                                                                                                                                                     |     |
| 49 |                                                        |                      |                                                                                                                                                                                                                                                                                                                     |     |
| 50 | <b>Methods</b>                                         |                      |                                                                                                                                                                                                                                                                                                                     |     |
| 51 |                                                        |                      |                                                                                                                                                                                                                                                                                                                     |     |
| 52 | Estimating resources and costs                         | <a href="#">#13b</a> | Model-based economic evaluation: Describe approaches and data sources used to estimate resource use associated with model health states. Describe primary or secondary research methods for valuing each resource                                                                                                   | n/a |
| 53 |                                                        |                      |                                                                                                                                                                                                                                                                                                                     |     |
| 54 |                                                        |                      |                                                                                                                                                                                                                                                                                                                     |     |
| 55 |                                                        |                      |                                                                                                                                                                                                                                                                                                                     |     |
| 56 |                                                        |                      |                                                                                                                                                                                                                                                                                                                     |     |
| 57 |                                                        |                      |                                                                                                                                                                                                                                                                                                                     |     |
| 58 |                                                        |                      |                                                                                                                                                                                                                                                                                                                     |     |
| 59 |                                                        |                      |                                                                                                                                                                                                                                                                                                                     |     |
| 60 |                                                        |                      |                                                                                                                                                                                                                                                                                                                     |     |

item in terms of its unit cost. Describe any adjustments made to approximate to opportunity costs.

|    |                       |                                                          |     |
|----|-----------------------|----------------------------------------------------------|-----|
| 1  |                       |                                                          |     |
| 2  |                       |                                                          |     |
| 3  |                       |                                                          |     |
| 4  | Currency, price date, | <a href="#">#14</a>                                      | n/a |
| 5  | and conversion        |                                                          |     |
| 6  |                       | Report the dates of the estimated resource quantities    |     |
| 7  |                       | and unit costs. Describe methods for adjusting estimated |     |
| 8  |                       | unit costs to the year of reported costs if necessary.   |     |
| 9  |                       | Describe methods for converting costs into a common      |     |
| 10 |                       | currency base and the exchange rate.                     |     |
| 11 |                       |                                                          |     |
| 12 | Choice of model       | <a href="#">#15</a>                                      | 6   |
| 13 |                       | Describe and give reasons for the specific type of       |     |
| 14 |                       | decision analytical model used. Providing a figure to    |     |
| 15 |                       | show model structure is strongly recommended.            |     |
| 16 |                       |                                                          |     |
| 17 | Assumptions           | <a href="#">#16</a>                                      | 6   |
| 18 |                       | Describe all structural or other assumptions             |     |
| 19 |                       | underpinning the decision-analytical model.              |     |
| 20 |                       |                                                          |     |
| 21 | Analytical methods    | <a href="#">#17</a>                                      | 6   |
| 22 |                       | Describe all analytical methods supporting the           |     |
| 23 |                       | evaluation. This could include methods for dealing with  |     |
| 24 |                       | skewed, missing, or censored data; extrapolation         |     |
| 25 |                       | methods; methods for pooling data; approaches to         |     |
| 26 |                       | validate or make adjustments (such as half cycle         |     |
| 27 |                       | corrections) to a model; and methods for handling        |     |
| 28 |                       | population heterogeneity and uncertainty.                |     |
| 29 |                       |                                                          |     |
| 30 |                       |                                                          |     |
| 31 |                       |                                                          |     |
| 32 |                       |                                                          |     |
| 33 | <b>Results</b>        |                                                          |     |
| 34 |                       |                                                          |     |
| 35 | Study parameters      | <a href="#">#18</a>                                      | 6   |
| 36 |                       | Report the values, ranges, references, and, if used,     |     |
| 37 |                       | probability distributions for all parameters. Report     |     |
| 38 |                       | reasons or sources for distributions used to represent   |     |
| 39 |                       | uncertainty where appropriate. Providing a table to show |     |
| 40 |                       | the input values is strongly recommended.                |     |
| 41 |                       |                                                          |     |
| 42 |                       |                                                          |     |
| 43 | Incremental costs and | <a href="#">#19</a>                                      | 6-7 |
| 44 | outcomes              |                                                          |     |
| 45 |                       | For each intervention, report mean values for the main   |     |
| 46 |                       | categories of estimated costs and outcomes of interest,  |     |
| 47 |                       | as well as mean differences between the comparator       |     |
| 48 |                       | groups. If applicable, report incremental cost-          |     |
| 49 |                       | effectiveness ratios.                                    |     |
| 50 |                       |                                                          |     |
| 51 |                       |                                                          |     |
| 52 | Characterising        | <a href="#">#20a</a>                                     | n/a |
| 53 | uncertainty           |                                                          |     |
| 54 |                       | Single study-based economic evaluation: Describe the     |     |
| 55 |                       | effects of sampling uncertainty for the estimated        |     |
| 56 |                       | incremental cost and incremental effectiveness           |     |
| 57 |                       | parameters, together with the impact of methodological   |     |
| 58 |                       | assumptions (such as discount rate, study perspective).  |     |
| 59 |                       |                                                          |     |
| 60 |                       |                                                          |     |

|    |                       |                      |                                                               |     |
|----|-----------------------|----------------------|---------------------------------------------------------------|-----|
| 1  | Characterising        | <a href="#">#20b</a> | Model-based economic evaluation: Describe the effects         | 7   |
| 2  | uncertainty           |                      | on the results of uncertainty for all input parameters, and   |     |
| 3  |                       |                      | uncertainty related to the structure of the model and         |     |
| 4  |                       |                      | assumptions.                                                  |     |
| 5  |                       |                      |                                                               |     |
| 6  |                       |                      |                                                               |     |
| 7  |                       |                      |                                                               |     |
| 8  | Characterising        | <a href="#">#21</a>  | If applicable, report differences in costs, outcomes, or      | n/a |
| 9  | heterogeneity         |                      | cost effectiveness that can be explained by variations        |     |
| 10 |                       |                      | between subgroups of patients with different baseline         |     |
| 11 |                       |                      | characteristics or other observed variability in effects that |     |
| 12 |                       |                      | are not reducible by more information.                        |     |
| 13 |                       |                      |                                                               |     |
| 14 |                       |                      |                                                               |     |
| 15 |                       |                      |                                                               |     |
| 16 | <b>Discussion</b>     |                      |                                                               |     |
| 17 |                       |                      |                                                               |     |
| 18 | Study findings,       | <a href="#">#22</a>  | Summarise key study findings and describe how they            | 11  |
| 19 | limitations,          |                      | support the conclusions reached. Discuss limitations and      |     |
| 20 | generalisability, and |                      | the generalisability of the findings and how the findings     |     |
| 21 | current knowledge     |                      | fit with current knowledge.                                   |     |
| 22 |                       |                      |                                                               |     |
| 23 |                       |                      |                                                               |     |
| 24 |                       |                      |                                                               |     |
| 25 | <b>Other</b>          |                      |                                                               |     |
| 26 |                       |                      |                                                               |     |
| 27 |                       |                      |                                                               |     |
| 28 | Source of funding     | <a href="#">#23</a>  | Describe how the study was funded and the role of the         | 14  |
| 29 |                       |                      | funder in the identification, design, conduct, and            |     |
| 30 |                       |                      | reporting of the analysis. Describe other non-monetary        |     |
| 31 |                       |                      | sources of support                                            |     |
| 32 |                       |                      |                                                               |     |
| 33 |                       |                      |                                                               |     |
| 34 | Conflict of interest  | <a href="#">#24</a>  | Describe any potential for conflict of interest of study      | 14  |
| 35 |                       |                      | contributors in accordance with journal policy. In the        |     |
| 36 |                       |                      | absence of a journal policy, we recommend authors             |     |
| 37 |                       |                      | comply with International Committee of Medical Journal        |     |
| 38 |                       |                      | Editors recommendations                                       |     |
| 39 |                       |                      |                                                               |     |
| 40 |                       |                      |                                                               |     |
| 41 |                       |                      |                                                               |     |
| 42 |                       |                      |                                                               |     |

The CHEERS checklist is distributed under the terms of the Creative Commons Attribution License CC-BY-NC. This checklist was completed on 09. September 2020 using <https://www.goodreports.org/>, a tool made by the [EQUATOR Network](#) in collaboration with [Penelope.ai](#)

# BMJ Open

## Does adherence to a quality indicator regarding early weaning from invasive ventilation improve economic outcome? A single-center retrospective study.

|                                 |                                                                                                                                                                                                                                                                                                                                                                                                                                                                                                                                                                                                                                                                                                                                                                                                                                                                                                                                                                                                                                                                                                                                                    |
|---------------------------------|----------------------------------------------------------------------------------------------------------------------------------------------------------------------------------------------------------------------------------------------------------------------------------------------------------------------------------------------------------------------------------------------------------------------------------------------------------------------------------------------------------------------------------------------------------------------------------------------------------------------------------------------------------------------------------------------------------------------------------------------------------------------------------------------------------------------------------------------------------------------------------------------------------------------------------------------------------------------------------------------------------------------------------------------------------------------------------------------------------------------------------------------------|
| Journal:                        | <i>BMJ Open</i>                                                                                                                                                                                                                                                                                                                                                                                                                                                                                                                                                                                                                                                                                                                                                                                                                                                                                                                                                                                                                                                                                                                                    |
| Manuscript ID                   | bmjopen-2020-045327.R1                                                                                                                                                                                                                                                                                                                                                                                                                                                                                                                                                                                                                                                                                                                                                                                                                                                                                                                                                                                                                                                                                                                             |
| Article Type:                   | Original research                                                                                                                                                                                                                                                                                                                                                                                                                                                                                                                                                                                                                                                                                                                                                                                                                                                                                                                                                                                                                                                                                                                                  |
| Date Submitted by the Author:   | 05-Aug-2021                                                                                                                                                                                                                                                                                                                                                                                                                                                                                                                                                                                                                                                                                                                                                                                                                                                                                                                                                                                                                                                                                                                                        |
| Complete List of Authors:       | Zuber, Alexander; Charité Universitätsmedizin Berlin, Institute of Medical Informatics; Charité Universitätsmedizin Berlin, Department of Anesthesiology and Operative Intensive Care Medicine<br>Kumpf, Oliver; Charité Universitätsmedizin Berlin, Department of Anesthesiology and Operative Intensive Care Medicine<br>Spies, Claudia; Charité Universitätsmedizin Berlin, Department of Anesthesiology and Operative Intensive Care Medicine<br>Höft, Moritz; Charité Universitätsmedizin Berlin, Department of Anesthesiology and Operative Intensive Care Medicine<br>Deffland, Marc; Charité Universitätsmedizin Berlin, Department of Anesthesiology and Operative Intensive Care Medicine<br>Ahlborn, Robert; Charité Universitätsmedizin Berlin, IT Department<br>Kruppa, Jochen; Charité Universitätsmedizin Berlin, Institute of Medical Informatics<br>Jochem, Roland; TU Berlin, Departments of Machine Tools and Factory Management<br>Balzer, Felix; Charité Universitätsmedizin Berlin, Department of Anesthesiology and Operative Intensive Care Medicine; Charité Universitätsmedizin Berlin, Institute of Medical Informatics |
| <b>Primary Subject Heading</b>: | Health economics                                                                                                                                                                                                                                                                                                                                                                                                                                                                                                                                                                                                                                                                                                                                                                                                                                                                                                                                                                                                                                                                                                                                   |
| Secondary Subject Heading:      | Intensive care, Health policy                                                                                                                                                                                                                                                                                                                                                                                                                                                                                                                                                                                                                                                                                                                                                                                                                                                                                                                                                                                                                                                                                                                      |
| Keywords:                       | INTENSIVE & CRITICAL CARE, Quality in health care < HEALTH SERVICES ADMINISTRATION & MANAGEMENT, HEALTH ECONOMICS                                                                                                                                                                                                                                                                                                                                                                                                                                                                                                                                                                                                                                                                                                                                                                                                                                                                                                                                                                                                                                  |
|                                 |                                                                                                                                                                                                                                                                                                                                                                                                                                                                                                                                                                                                                                                                                                                                                                                                                                                                                                                                                                                                                                                                                                                                                    |

SCHOLARONE™  
Manuscripts



I, the Submitting Author has the right to grant and does grant on behalf of all authors of the Work (as defined in the below author licence), an exclusive licence and/or a non-exclusive licence for contributions from authors who are: i) UK Crown employees; ii) where BMJ has agreed a CC-BY licence shall apply, and/or iii) in accordance with the terms applicable for US Federal Government officers or employees acting as part of their official duties; on a worldwide, perpetual, irrevocable, royalty-free basis to BMJ Publishing Group Ltd ("BMJ") its licensees and where the relevant Journal is co-owned by BMJ to the co-owners of the Journal, to publish the Work in this journal and any other BMJ products and to exploit all rights, as set out in our [licence](#).

The Submitting Author accepts and understands that any supply made under these terms is made by BMJ to the Submitting Author unless you are acting as an employee on behalf of your employer or a postgraduate student of an affiliated institution which is paying any applicable article publishing charge ("APC") for Open Access articles. Where the Submitting Author wishes to make the Work available on an Open Access basis (and intends to pay the relevant APC), the terms of reuse of such Open Access shall be governed by a Creative Commons licence – details of these licences and which [Creative Commons](#) licence will apply to this Work are set out in our licence referred to above.

Other than as permitted in any relevant BMJ Author's Self Archiving Policies, I confirm this Work has not been accepted for publication elsewhere, is not being considered for publication elsewhere and does not duplicate material already published. I confirm all authors consent to publication of this Work and authorise the granting of this licence.

1  
2  
3  
4 1 **Title:**

5  
6 2 **Does adherence to a quality indicator regarding early weaning from invasive**  
7 3 **ventilation improve economic outcome? A single-center retrospective study.**

8  
9  
10 4 **Authors:**

11 5 Zuber A<sup>1,2</sup>, Kumpf O<sup>2</sup>, Spies C<sup>2</sup>, Höft M<sup>2</sup>, Deffland M<sup>2</sup>, Ahlborn R<sup>3</sup>, Kruppa J<sup>1</sup>, Jochem R<sup>4</sup> and Balzer F<sup>1,2</sup>

12 6 <sup>1</sup> Institute of Medical Informatics, Charité - Universitätsmedizin Berlin, corporate member of Freie Universität Berlin, Humboldt-Universität  
13 7 zu Berlin, and Berlin Institute of Health, Augustenburger Platz 1, 13353 Berlin, Germany

14 8 <sup>2</sup> Department of Anesthesiology and Operative Intensive Care Medicine, Campus Virchow-Klinikum and Campus Charité Mitte, Charité -  
15 9 Universitätsmedizin Berlin, corporate member of Freie Universität Berlin, Humboldt-Universität zu Berlin, and Berlin Institute of Health,  
16 10 Augustenburger Platz 1, 13353 Berlin

17 11 <sup>3</sup> IT Department of Charité - Universitätsmedizin Berlin, corporate member of Freie Universität Berlin, Humboldt-Universität zu Berlin, and  
18 12 Berlin Institute of Health, Charitéplatz 1, 10117 Berlin, Germany

19 13 <sup>4</sup> Departments of Machine Tools and Factory Management, Technical University Berlin, Pascalstr. 8-9, 10587 Berlin, Germany  
14

15  
16 16 **Corresponding Author:**

17 17 Professor Felix Balzer

18 18 Institute of Medical Informatics, Charité - Universitätsmedizin Berlin, corporate member of Freie  
19 19 Universität Berlin and Humboldt-Universität zu Berlin, Berlin, Germany.

20 20 Department of Anesthesiology and Operative Intensive Care Medicine, Campus Virchow-Klinikum  
21 21 and Campus Charité Mitte, Charité - Universitätsmedizin Berlin, corporate member of Freie  
22 22 Universität Berlin, Humboldt-Universität zu Berlin, and Berlin Institute of Health, Augustenburger  
23 23 Platz 1, 13353 Berlin

24 24 E-Mail: felix.balzer@charite.de

25 25 **Orcid-IDs:**

26 26 Felix Balzer: <https://orcid.org/0000-0003-1575-2056>

27 27 Alexander Zuber: <https://orcid.org/0000-0002-6789-8471>

28 28 Oliver Kumpf: <https://orcid.org/0000-0001-7891-8872>

29 29 Claudia Spies: <https://orcid.org/0000-0002-1062-0495>

30 30 **Key Words:** Critical Care, Intensive Care Unit, Quality Indicator, Transparency, Health Economics

31 31 **Type:** Original Research

32 32 **Word Count:** 4,505

33 33 **Supplementary and raw data:** Dataset anonymized upon request  
34



**ABSTRACT**

**Objectives** To measure and assess the economic impact of adherence to a single quality indicator (QI) regarding weaning from invasive ventilation.

**Design** Retrospective observational single center study, based on electronic medical and administrative records.

**Setting** Intensive Care Unit (ICU) of a German university hospital, reference center for acute respiratory distress syndrome.

**Participants** Records of 3,063 consecutive mechanically ventilated patients admitted to the ICU between 2012 and 2017 were extracted, of whom 583 were eligible adults for further analysis. Patients' weaning protocols were evaluated for daily adherence to quality standards until ICU discharge. Patients with <65% compliance were assigned to the low adherence group (LAG), patients with ≥65% to the high adherence group (HAG).

**Primary and secondary outcome measures** Economic health care costs, clinical outcomes and patients' characteristics.

**Results** The LAG consisted of 378 patients with a median negative economic results of -3,969€, HAG of 205 (-1,030€) respectively ( $P < 0.001$ ). Median duration of ventilation was 476 [248;769] hours in the LAG and 389 [247;608] hours in the HAG ( $P < 0.001$ ). Length of stay (LOS) in the LAG on ICU was 21 [12;35] days and 16 [11;25] days in the HAG ( $P < 0.001$ ). LOS in the hospital was 36 [22;61] days in the LAG, and within the HAG respectively 26 [18;48] days ( $P = 0.001$ ).

**Conclusions** High adherence to this single quality indicator is associated with better clinical outcome and improved economic returns. Therefore, the results support the adherence to quality indicator. However, the examined quality indicator does not influence economic outcome as the decisive factor.

**Strengths and limitations of this study:**

- This is the first study evaluating whether a quality indicator on weaning has effects on the economic outcome parameters on a per case basis
- Results of the cost unit accounting practice is well established and is thus representative for a detailed examination of unit costs
- The test and validation sample was taken from a reference center specialized on acute respiratory distress syndrome in adult patients with severe medical conditions
- Control for interactions with other quality indicators is necessary as the examined quality indicator is potentially connected with other ones
- The study results are based on German reimbursement system and might be typical for a tertiary university hospital rather than German hospitals in general

## 70 INTRODUCTION

71 In the last decades, the need for quality management (QM) in the hospital has been growing. On one  
72 hand costs have been rising and on the other patients, health insurance and public pressure urge  
73 hospitals to improve outcome and services by cutting or tying reimbursement to valid quality  
74 indicators [1]. This is why in the medium and long run quality-oriented reimbursement (pay for  
75 quality) might change the hospital landscape [2]. Economics of health have been established widely  
76 in order to curb costs for the national health care system. Many countries introduced diagnosis  
77 related groups (DRGs) in order to pay on averaged costs and on a generalized financial  
78 reimbursement per case (fixed prices). Reimbursement for inpatients is linked to DRG accounting and  
79 updated annually based on reported data from hospitals. The fee-for-service system induces  
80 hospitals to improve internal processes as reimbursement is predefined and to work goal-oriented  
81 towards therapeutic aims [3].

82 In modern medicine, a considerable part of hospital costs arises from intensive care. The cost  
83 structure of a tertiary German hospital shows that ca. 20% of costs are generated in ICUs [4].  
84 Especially, mechanical ventilation is the main cost driver in ICUs [5]. Approximately 6% of the  
85 patients in intensive care are affected by prolonged mechanical ventilation and weaning from  
86 mechanical ventilation represents an essential element in the treatment of critically ill patients as it  
87 can take up to 50% of the ventilation time [6]. As a consequence, up to 37% of all ICU resources are  
88 allocated to these patients [7]. This means that weaning patients from mechanical ventilation is not  
89 only essential for clinical outcomes like duration of ventilation or LOS [8,9], but also a critical step  
90 from an economic perspective as costs can be reduced. Therefore, this process is a critical phase in  
91 intensive care. However, the ideal weaning process is still subject to debate [10]. About 40% of  
92 patients receiving mechanical ventilation will experience a complicated weaning process [11].  
93 Patients categorized in prolonged weaning, failing at least three spontaneous breathing trials or  
94 receiving more than seven days of weaning after the first spontaneous breathing trials, have an  
95 increased risk in developing hospital mortality, mainly through ventilator-associated pneumonia  
96 (VAP) [6], but also through post intensive care syndrome (PICS) or chronic critical illness (CCI) [12].  
97 Due to demographic changes and technological advances in intensive care, the number of older  
98 patients with complex diseases or comorbidities needing ventilation is increasing [13,14]. This  
99 generates growing costs, as the cohort of patients requiring respiratory support accounts for a  
100 disproportionate percentage of the resources available in intensive care [15].

101 With the purpose of managing quality throughout the difficult framework conditions of hospital care,  
102 a proactive and structured QM is essential [16]. In general, QM focuses on securing and improving  
103 clinical services economically, performed by physicians or nurses according to the patient's needs  
104 [17]. In Germany, in the context of European and national QM initiatives, consensus-based  
105 standardized QIs were developed for intensive care medicine since 2010 – third version in 2017 – by  
106 the German interdisciplinary society for intensive and emergency care (DIVI) in order to simplify the  
107 measurement of relevant quality data, to record timely and to allow transparent comparisons of  
108 patient data. The according quantification of QM helps measuring effectiveness and efficiency of  
109 ICUs [18,19]. QIs enable a descriptive picture of the actual condition and are an indispensable  
110 instrument for comparisons between different states of quality [18]. Potentially, widely-accepted QIs  
111 can progress hospital economics and support the reduction of the national budget for health care,  
112 even though a recent study has shown that cost-quality relationships are difficult to generate [20].

113 QIs empower advances in intensive care medicine to be measured and evaluated on a regular basis  
114 [19]. QIs can be defined as representative figures for quality of structure, processes or outcome  
115 within the medical care process. Thus, indicators are useful for measuring improvement in the

1  
2  
3  
4 116 context of quality management and should be developed in line with evidence-based literature [21].  
5 117 Ideally, measures for QIs can be extracted from routine patient data to avoid excess documentation  
6 118 work. Therefore, patient data management systems (PDMS) are pivotal for measuring complex  
7 119 quality figures [18]. The economic aspects for the whole hospital of the introduction of QIs are not  
8 120 well investigated. However, there is evidence that the application of QIs is a value-creating instrument  
9 121 [12].

11 122 The objective of this study was, to determine the economic impact of adherence to a single quality  
12 123 indicator evaluating the weaning process from invasive ventilation. We analyzed this by comparing  
13 124 economic results per case and clinical outcome parameters like LOS between two groups of either  
14 125 high or low quality adherence. Additionally, we sought to determine factors that would influence a  
15 126 potential interaction between economic and outcome parameters.

## 18 127 **METHODS**

20 128 This original research is in accordance with the Consolidated Health Economic Evaluation Research  
21 129 Standards (CHEERS).

### 23 130 **Patient and public involvement**

25 131 Patients and the public were not directly involved in this observational study.

### 27 132 **Study Center**

29 133 We conducted this single study-center in a university hospital (Charité - Universitätsmedizin Berlin).  
30 134 This observational analysis was performed at a 14-bed ICU (reference center), specialized in  
31 135 treatment of acute respiratory distress syndrome in adult patients. All patients at our ICU were  
32 136 treated according to guidelines and internal standard operating procedures for clinical practice [22].

### 34 137 **Study Design**

36 138 This was a retrospective descriptive study, using data from multiple electronic databases used in  
37 139 routine patient care and for routine administrative purposes. All patients admitted to and discharged  
38 140 from the ICU between 1 January 2012 and 31 December 2017 who received invasive ventilation  
39 141 during their stay were eligible to be included in this study. Furthermore, duration of ventilation <95  
40 142 hours, receiving no invasive ventilation, terminal status, incomplete patient record or missing  
41 143 readiness to be weaned were defined as exclusion criteria (see figure 1).

44 144 The study was approved by the Ethics Commission of Charité – Universitätsmedizin Berlin  
45 145 (EA2/139/20). The need for patient's consent was waived due to the retrospective nature of the  
46 146 study. Confidentiality was guaranteed, no interventions were performed and only clinical routine  
47 147 data were collected. Data were retrieved from a PDMS called COPRA (Computer Organized Patient  
48 148 Report Assistant; COPRA System GmbH, Berlin, Germany). Data are recorded both automatically by  
49 149 patient monitors and manually by caregivers. The ICU staff validates all information manually.  
50 150 However, the design of the PDMS prevents manual alterations to the data, for example adding  
51 151 missing values after discharge from the ICU. PDMS data are also transferred to the clinical  
52 152 information and accounting system (SAP, Walldorf, Germany). Based on this administrative system,  
53 153 cost unit accounting is performed annually. In addition to basic demographic data, we assessed  
54 154 clinical and administrative parameters of in-patient cases (e.g. LOS). Data were retrieved using a  
55 155 structured query. No patient identifiers were extracted in order to secure anonymity of patients'  
56 156 data. Data related to diagnoses were not retrieved from the administrative systems.

1  
2  
3  
4 157 PDMS data of patients included in the study were transferred to the study database, where we also  
5 158 collected the administrative and cost accounting data respectively. We contrasted patient, intensive  
6 159 care and economic parameters of the two adherence groups (see table 1). Then, we calculated the  
7 160 profits per case by subtracting costs of reimbursement per case. In order to generate an economic  
8 161 outcome per case for the dependent variable in multivariate linear regression. Besides administrative  
9 162 data, we used different scores for assessing the QI for eligibility. Selection criteria were: (i) no  
11 163 additional workload required for documentation, (ii) the availability within the PDMS system, (iii)  
12 164 standardized values for all patients and the existence of standard operating procedures for each  
13 165 indicator and (iv) the relevance of the indicator for clinical decision-making [19,23].

## 15 166 **Procedures**

17 167 In this study, we used present KPIs in order to examine the adherence to the quality indicator “Early  
18 168 Weaning from Invasive Ventilation” until ICU discharge [8]. A small set of evidence-based key  
19 169 performance indicators (KPIs) was established in 2009, providing indicators that were already  
20 170 available within the PDMS. The KPIs in intensive care medicine proved helpful for practical use and  
21 171 compliance with standard operating procedures. A description of the KPI is provided in the  
22 172 supplementary material. Within the weaning therapy, fast visual feedback for “readiness to wean”  
23 173 and “weaning protocol compliance” were implemented. If both KPIs were positive, the according  
24 174 result of the “spontaneous breathing trial” (SBT) was recorded [23]. Once the patient was assessed to  
25 175 be ready to wean since the primary disease showed clinical improvement, the standard weaning  
26 176 protocol activities were conducted on a daily basis according to standard operating procedures.  
27 177 Congruent with clinical guidelines in place, weaning protocols were adapted to evaluate the progress  
28 178 of respirator therapy [22]. The subsequent result was recorded in the weaning protocol. For each  
29 179 patient, we monitored the daily weaning protocol compliance between readiness to wean and ICU-  
30 180 discharge in order to evaluate the percentage of adherence. Within the weaning process, the SBT  
31 181 represents the major diagnostic test to evaluate if the patient can be extubated successfully [10]. The  
32 182 SBT is successful if the patient succeeded the trial and does not have to be re-intubated within 48  
33 183 hours [24]. This process is directly linked to a specific QI for weaning derived from the DIVI-QI [19]. A  
34 184 definition of the indicator is presented in the supplementary material.

## 39 185 **Outcome Parameters**

41 186 In this study, we investigated for economic results, clinical outcome parameters per case and the  
42 187 respective adherence to quality. Economic results were defined as the profit or loss per case, by  
43 188 subtracting all assigned costs from the reimbursement on a case level. Clinical outcomes as a  
44 189 representative for clinical effectiveness were measured in order to set economic outcomes in  
45 190 relation to the purpose of medicine. Adherence to quality was calculated on a per case level in order  
46 191 to categorize the patients into groups.

49 192 We used the adherence level of the examined quality indicator in order to create two quality groups.  
50 193 We calculated the final quality level by averaging the daily indicator results for the duration with  
51 194 equal weights per day. In order to set the optimal cutoff point for dichotomously distinguishing  
52 195 between high-adherence and low-adherence of weaning quality, we combined recommendations  
53 196 from literature with our institutional standards. A cutoff value of 70% deemed as a suitable  
54 197 fulfillment-threshold for quality indicators [25]. However, due to partially high workload under  
55 198 certain circumstances in intensive care, we decided to lower the cutoff for 5% tolerance in order to  
56 199 account for missing values in documentation. Therefore, we inserted a cutoff for weaning protocol  
57 200 compliance at 65% adherence. The LAG was defined as adherence to QI of less than 65%. The HAG  
58 201 was defined as adherence to QI of equal or more than 65%. Once this threshold was reached, the QI  
59 202 was characterized as high-adherence.

## 203 Statistical Analyses

204 Descriptive analyses and statistical testing were performed using SPSS, version 14.0 (SPSS Inc.,  
205 Chicago, IL, USA) for Windows. Results are expressed as median (interquartile range) or frequency  
206 (%). We controlled data for risk and severity by exclusion as patients and therapies in intensive care  
207 are heterogenic, as studies have shown [18]. Differences between the adherence groups in terms of  
208 outcome parameters were tested using the univariate unpaired t-test and chi-squared statistics for  
209 independent variables as appropriate with a *P*-value below 0.05 regarded as significant.

210 In order to investigate the influencing factors in more detail, parameters that were found to be  
211 statistically significant on univariate analysis or out of discussion among the experts underwent  
212 stepwise multivariate analyses. We used multiple linear regression analyses to model the  
213 relationship between the independent variables and the outcome of profitability. Regression  
214 coefficients (95% Confidence Interval (CI)) and the corresponding *P*-values were calculated for each  
215 factor. Testing the dataset for outliers was performed using the cook distance test, based on the  
216 model. The test did not indicate the need to dismiss cases from the sample. Due to an exploratory  
217 character of the research, no adjustments for multiple testing were made.

## 218 RESULTS

219 All patients with complete electronic patient records (n=3,063 patients) were screened for eligibility.  
220 After selection regarding inclusion and exclusion criteria, 583 patients were included in the final  
221 analysis (Figure 1). Of these patients, 378 showed low-adherence if the indicator was below 65% and  
222 205 showed high-adherence. The median age of admitted patients was 57 [40;70] years; 64.7 % of  
223 patients were male. There were significantly (*P* = 0.038) more male patients within the HAG (70.2%)  
224 than in the LAG (61.6%). As reflected by a median APACHE II admission score of 21 [14;27], a SAPS II  
225 admission score of 47 [34;61] and a SOFA admission score of 9 [7;12], the study population was  
226 characterized by severe medical conditions. Patient demographics are displayed in Table 1. Along the  
227 line, at discharge patients generated an average daily SOFA score of 8.2 [6.6;10.3] indicating  
228 resource-intensive monitoring and treatment of the patient.

229 In order to account for the remaining clinical patient outcomes after grouping, we analyzed the  
230 ventilation parameters. Overall in the median, patients were ventilated for 431 [250;709] hours on  
231 the ICU and 578 [338;924] throughout their hospital stay. Following the division into two adherence  
232 groups, there was a significant reduction in duration of ventilation on ICU from 476 to 389 hours (*P* <  
233 0.001). Overall in-hospital duration of ventilation was decreased from 597 to 535 hours (*P* = 0.017).  
234 Concerning the number of SBTs and reintubations, there was no significant finding (*P* = 0.456 and *P* =  
235 0.531). In addition to the significant decrease in ventilation parameters seen between the differences  
236 in adherence, the LOS was decreased by 5 days from 21 to 16 (*P* < 0.001) and overall in-hospital LOS  
237 decreased from 36 to 26 days per patient (*P* = 0.001) in the median, indicating strong arguments for  
238 quality indicator adherence. With regard to economic outcome, the overall median economic results  
239 (loss) per case was -2,999€. There was an increase in profitability from a median loss of 3,696€ to  
240 1,030€ (*P* < 0.001).

241 Considering the discharge of the patients, there was a highly significant difference (*P* < 0.001)  
242 between both groups. Most patients were discharged to intermediate care (44.6%), other ICUs  
243 (27.6%) or rehabilitation (18.9%). Within the LAG, 50 (13.2%) patients died on the ICU compared to 2  
244 (1.0%) in the HAG. This gives room to assume a certain impact of weaning quality on mortality.  
245 However, since we didn't include diagnosis data, we cannot exclude an influence from this fact.

246

**Table I. Patient demographics and outcome parameters in comparison between QI adherence groups**

|                                            | All Patients           | LAG                    | HAG                    | P-Value |
|--------------------------------------------|------------------------|------------------------|------------------------|---------|
|                                            | n = 583                | QI < 65%               | QI ≥ 65%               |         |
|                                            |                        | n = 378                | n = 205                |         |
| <b>Demographics</b>                        |                        |                        |                        |         |
| Age [y]                                    | 57 [40;70]             | 57 [40;70]             | 55 [42;69]             | 0.770   |
| Gender [m]                                 | 377 (64.7%)            | 233 (61.6%)            | 144 (70.2%)            | 0.038   |
| ICU Score on admission                     |                        |                        |                        |         |
| · APACHE II                                | 21 [14;27]             | 21 [15;27]             | 21 [14;27]             | 0.986   |
| · SAPS II                                  | 47 [34;61]             | 47 [35;60]             | 47 [34;62]             | 0.860   |
| · SOFA                                     | 9 [7;12]               | 9 [7;12]               | 9 [7;13]               | 0.526   |
| Average SOFA                               | 8.2 [6.6;10.3]         | 8 [6.5;10.1]           | 8.4 [6.8;10.7]         | 0.140   |
| Type of admission to Study-ICU             |                        |                        |                        | 0.651   |
| · Medical                                  | 290 (49.7%)            | 190 (50.3%)            | 100 (48.8%)            |         |
| · Emergency surgery                        | 232 (39.8%)            | 146 (38.6%)            | 86 (41.9%)             |         |
| · Elective surgery                         | 61 (10.5%)             | 42 (11.1%)             | 19 (9.3%)              |         |
| <b>Outcome Parameter</b>                   |                        |                        |                        |         |
| Duration of Ventilation Study-ICU [h]      | 431 [250;709]          | 476 [248;769]          | 389 [247;608]          | <0.001  |
| Total Duration of Ventilation Hospital [h] | 578 [338;924]          | 597 [310;992]          | 535 [361;821]          | 0.017   |
| No. Spontaneous breathing trials (SBTs)    | 1 [0;2]                | 1 [0;2]                | 1 [0;2]                | 0.456   |
| No. Reintubation                           | 0 [0;1]                | 0 [0;1]                | 0 [0;1]                | 0.531   |
| Type of Discharge of Study-ICU             |                        |                        |                        | <0.001  |
| · ICU                                      | 161 (27.6%)            | 100 (26.5%)            | 61 (29.8%)             |         |
| · Intermediate / Ward                      | 260 (44.6%)            | 172 (45.5%)            | 88 (42.9%)             |         |
| · Rehabilitation                           | 110 (18.9%)            | 56 (14.8%)             | 54 (26.3%)             |         |
| · ICU-Mortality                            | 52 (8.9%)              | 50 (13.2%)             | 2 (1.0%)               |         |
| LOS Study-ICU [d]                          | 19 [11;32]             | 21 [12;35]             | 16 [11;25]             | <0.001  |
| LOS Hospital [d]                           | 33 [20;54]             | 36 [22;61]             | 26 [18;48]             | 0.001   |
| Profit [€]                                 | -2,999 [-15,946;7,730] | -3,696 [-21,170;6,828] | -1,030 [-11,134;9,449] | <0.001  |

Discrete variables are presented as a total number of encounters and were analyzed with Chi square test for nonparametric samples.

APACHE II, Acute physiology and chronic health evaluation; SAPS, Simplified acute physiology score; SOFA, Sequential organ failure assessment; Average SOFA, Averaged sequential organ failure assessment; ICU, Intensive care unit; SBT, Spontaneous breathing trial; LOS, Length of stay

247

## 248 **Multiple Linear Regression**

249 The results of the multivariate linear regression analysis of the complete study population of 583  
250 patients are given in table 2. The parameters were not adjusted for severity of illness. The fixed  
251 variables age, sex and percentage of quality indicator adherence examined did not show significant  
252 effects on profitability.

253 In the linear regression analysis, the LOS on the study-ICU ( $P < 0.001$ ), the LOS in the hospital ( $P <$   
254  $0.001$ ), the averaged daily SOFA score ( $P < 0.001$ ) and the averaged daily costs per patient ( $P < 0.001$ )  
255 were shown to have significant effects on the profitability (table 2). Strong effects were found for the  
256 averaged daily SOFA score, which increased profits per case by 1,608€ [CI: 892€, 2,323€] for each  
257 SOFA point. Furthermore, the LOS on the ICU decreased profits per case for 529€ for every day  
258 longer on the ICU. To the best of our knowledge, multivariate regression for economic outcome has  
259 not yet been conducted for these factors. The regression model was performed without the  
260 admission scores for SAPSII, SOFA and APACHEII. When these scores were included, the statistical  
261 significances remained unchanged for the remaining variables that were analyzed (s. table 2).

262 Comparing the cumulative parameters of weaning patients along the years (see table 3), a higher  
263 number of patients weaned as well as a higher average SOFA-score can be associated with a higher  
264 number of median economic result. The observation over time supports the outcome parameters of  
265 table 1. Considering the development since 2012, there is an increase in the number of patients  
266 weaned per year and a decrease in the median hours of ventilation per patient.

267

268

**Table 2 - Multiple linear regression analysis of factors affecting the profit of 583 intensive care patients who underwent the weaning process**

| Variable                 | B (95% CI)            | SE    | P-Value |
|--------------------------|-----------------------|-------|---------|
| Age [y]                  | -16 (-119; 87)        | 52    | 0.765   |
| Gender [m]               | 1,139 (-2,628; 4,906) | 1,918 | 0.553   |
| Quality <sup>1</sup> [%] | 3,732 (-2,457; 9,920) | 3,151 | 0.237   |
| LOS Study-ICU [d]        | -529 (-671; -387)     | 72    | <0.001  |
| LOS Hospital [d]         | -143 (-213; -71)      | 36    | <0.001  |
| Reintubations            | -928 (-2,457; 602)    | 779   | 0.234   |
| Average SOFA             | 1,608 (892; 2,323)    | 364   | <0.001  |
| Daily Costs [€]          | -7.6 (-11; -4)        | 2     | <0.001  |

<sup>1</sup> Quality, Adherence to the quality indicator "Early Weaning from invasive ventilation"

269

270

**Table 3 - Financial demographics in median over time of 583 patients who underwent the weaning process**

| Variable                          | 2012                       | 2013                      | 2014                     | 2015                     | 2016                     | 2017                       |
|-----------------------------------|----------------------------|---------------------------|--------------------------|--------------------------|--------------------------|----------------------------|
| Weaning Patients                  | 65                         | 82                        | 100                      | 114                      | 125                      | 97                         |
| Average SOFA                      | 7.5<br>[5.6; 9.3]          | 8.3<br>[6.7; 11.0]        | 8.2<br>[6.5; 10.1]       | 8.1<br>[6.6; 9.6]        | 8.9<br>[7.0; 10.7]       | 8.3<br>[6.7; 11.0]         |
| Duration of Ventilation [h]       | 660<br>[480; 977]          | 451<br>[230; 667]         | 400<br>[206; 673]        | 439<br>[261; 720]        | 374<br>[239; 602]        | 364<br>[210; 619]          |
| Case-Mix Index <sup>1</sup>       | 22.7<br>[19.1; 30.1]       | 18.0<br>[11.0; 23.9]      | 19.6<br>[11.6; 28.1]     | 18.8<br>[10.9; 23.8]     | 17.7<br>[11.6; 29.1]     | 23.2<br>[13.9; 32.2]       |
| Profits per Case <sup>2</sup> [€] | -12,517<br>[-24,848; -806] | -11,011<br>[-28,547; 999] | -945<br>[-14,141; 8,843] | 390<br>[-11,340; 12,201] | 3,439<br>[-7,494; 8,784] | -3,136<br>[-22,012; 8,284] |

<sup>1</sup>Case-Mix Index, Averaged case-mix per case according to German DRG-System

<sup>2</sup>Averaged financial result per case

271



## 272 DISCUSSION

273 The most important finding was that clinical and economic results were better within the HAG than  
274 the LAG. We sought to evaluate whether adherence above a certain quality threshold leads to a  
275 better economic result per case for the hospital. Our univariate model confirmed our hypothesis that  
276 higher quality leads to better LOS and hospital costs of intensive care patients. However, an  
277 improvement of the quality indicator “early weaning” was not directly associated with a significant  
278 impact on the profitability per case. In the regression model, we were not able to prove that more  
279 quality lead to higher earnings. Instead, significant factors were clinical outcome parameters (LOS  
280 ICU, LOS Hospital and averaged daily SOFA score), which had direct effects on profitability.  
281 Moreover, these parameters were also superior within the HAG, indicating a certain quality effect.  
282 This sequence of effects shows that quality affects the economic results indirectly via clinical  
283 outcome. This means that quality leads to clinical efficiency. Literature already proposes a more  
284 effective use of the costly resource ICU [26]. Thus, from an economic perspective it is recommended  
285 to transfer patients as early as possible from ICU downstream (e.g. intermediate care) since a  
286 prolonged ICU-stay might be inappropriate, dangerous and costly [23,25].

287 Highly specialized ICUs are resource- and cost-intensive and not universally available. By  
288 implementing QM as a method to constantly eliminating the factors of chance, hospitals are trying to  
289 reduce complexity in defining, measuring and learning from QIs. Furthermore, QM is associated as a  
290 necessity for certification processes and therefore incremental part of critical care concepts [1]. The  
291 importance of weaning protocols and according adherence is based on studies that have proven  
292 between 70-80% of all patients receiving >24h invasive ventilation could already be weaned after the  
293 first SBT [8,27,28]. This is why in 2011, a study at our institution investigated that the support of fast  
294 visual feedback for adherence to standard operating procedures within the PDMS led to decreased  
295 duration of mechanical ventilation and higher documentation compliance, supporting our findings  
296 [29]. The approach of measuring and steering quality with indicators carries several direct and  
297 indirect economic incentives. First, less loss per patient due to better clinical outcome has positive  
298 effects on the general economic results of the department. Second, decreased LOS on the ICU gives  
299 room to available beds earlier and therefore other patients to fill in the existing resource [30]. Third,  
300 because of public reporting and potential pay for quality structures, indicators are important  
301 methods for measuring quality and safety in health care, resulting in better outcome [31]. In  
302 particular, transparent quality indicators allow department leaders to identify weak spots and initiate  
303 improvement in a structured and measurable way [2]. Our matched with a study performed in 2008,  
304 showing positive clinical outcome effects of ventilator weaning protocol measures [32]. Patients  
305 spent less time on mechanical ventilation, and thus less time in intensive care and in the hospital. We  
306 found that the more patients that could be weaned per year, the less time they spent on the  
307 ventilator and better the economic results followed, since more patients generating contribution  
308 margins covered fixed costs. This effect shows that redundant capacities can be used for new  
309 admissions and thus higher throughput, similar to a former study at our institution [33].

310 This study is the first to find that high-adherence to the quality indicator “Early weaning from  
311 invasive ventilation” above a proven threshold of 65% showed higher economic returns (or less  
312 losses) than low-adherence. Furthermore, the study is unique in using a case defined data set to  
313 examine the economic effect of a single quality indicator. Current economic prediction models in  
314 intensive care usually describe interventions of entire quality management programs [30] or changes  
315 in staffing [33]. Overall, we found that the median financial return for a hospital is negative when  
316 focusing on weaning from ventilation. This is independent of their QI adherence results. In Germany,  
317 insurance companies reimburse hospitals using the G-DRG System (German Diagnosis Related  
318 Groups System) based on a performance-oriented compensation for inpatients. Within DRG-Systems

1  
2  
3  
4 319 [30], the case-mix of weaning patients does not provide adequate economic incentives for quality  
5 320 based critical care since the reimbursement is mainly focused on procedures, e.g. duration of  
6 321 ventilation. This is consistent with other studies that found higher process quality led to decreased  
7 322 ventilator dependence and reduced reimbursement [25,26,34]. To avoid wrong incentives,  
8 323 reimbursement should potentially be tied to patient-centered outcomes. For example, the  
9 324 prevention of ventilator-associated pneumonia, post intensive care syndrome and chronic critical  
10 325 illness. In this study, we used comprehensive per-patient cost data, based exclusively on the DRG-  
11 326 system. At our institution, a case-related cost calculation is well established and highly accurate for  
12 327 reimbursement per case and costs since we have been substantial cost-accounting reference center  
13 328 since the beginning of the G-DRG-system. Therefore, we used this administrative data to calculate  
14 329 the economic outcome per case [35]. In Germany, a representative mix of hospitals gather case-  
15 330 related treatment costs on a yearly basis in order to report them to the Institute for the Hospital  
16 331 Reimbursement System for continuous development [36]. On an annual basis, cost weights are  
17 332 adjusted for each DRG, potentially leading to higher reimbursement per case. Hospitals can also  
18 333 benefit from economies of scale, considering more cases per year with fixed reimbursement values.  
19 334 This may explain why in 2015 and 2016 profits per case were higher.

20  
21  
22  
23  
24 335 The results of this study can inform policy makers on the following points: In Germany, the  
25 336 application of quality indicators in critical care is so far not mandatory [12]. Since positive effects of  
26 337 clinical and economic parameters can be found measuring the adherence to only one indicator of the  
27 338 DIVI set (n=10), it is recommended to establish QIs widely and combine patient-centered outcomes  
28 339 with economic outcomes systematically. Over the years examined, we found that weaning and the  
29 340 according QI have developed positively as the number of patients receiving weaning increased while  
30 341 the duration of ventilation per patient decreased. The relation between these two parameters shows  
31 342 that the quality of care increased and the organization for the volume effect became more efficient,  
32 343 which is a dominant economic factor according to Nguyen et al. [37]. However, in order to evolve  
33 344 further in this direction, intensive care needs adequate reimbursement. Higher assessment scores as  
34 345 SAPS II or SOFA play an important role in ICU reimbursement and might induce higher DRG  
35 346 reimbursement. Considering QM, contrary to the majority of ward care, which benefits from shorter  
36 347 LOS within the flat-compensation system, a decrease in LOS in intensive care is not rewarded with  
37 348 higher reimbursement. Literature confirms our analyses [36]. This is why we recommend that efforts  
38 349 for quality should be shifted in the center of reimbursement in intensive care for better clinical  
39 350 outcomes, following the approach of valued-based payment (pay for quality), where ICUs are  
40 351 checked upon costs and quality of service [38]. Furthermore, because keeping patients on the ICU  
41 352 and on mechanical ventilation economically-incentivized is proven to be dangerous for the patient  
42 353 [8] and inefficient for the organization [30]. This structural change can ensure the incentives for  
43 354 intensivists to adhere to quality standards instead of collecting ventilation hours. Our argument is  
44 355 supported by a recent publication of a group of experts in intensive care. They argue in favor for a  
45 356 reform in hospital reimbursement, away from flat-compensation towards progressive levels of  
46 357 intensive care. Moreover, they suggest a central planning of all system relevant intensive care  
47 358 infrastructures and according criteria for quality standards [39]. In the end, hospitals benefit from  
48 359 investments in quality, as clinical quality has subsequent effects on economic returns. Thus, not only  
49 360 hospitals, insurance companies and policy makers profit from adherence to quality indicators, also  
50 361 the patient who should be in the center of healthcare does.

## 51 362 **Unanswered questions and future research**

52  
53 363 As noted previously, the study was conducted in a tertiary university hospital, which is characterized  
54 364 by specific and well-established medical processes and structures. A transfer of our observations to  
55 365 other ICUs or reimbursement systems is not feasible. The current study is subject to its retrospective

1  
2  
3  
4 366 design and potential selection bias, as some of the cases with incomplete data or special diagnoses  
5 367 were not detected during the observation period. We could have used neurological and  
6 368 neurosurgical diagnoses to exclude patients with low chances for weaning outcome, but in our  
7 369 administrative system there is no time point matched to it accordingly as diagnoses are often added  
8 370 just before discharge. For example: Patients developing specific neurological conditions after their  
9 371 stay on the study-ICU. Some aspects of our analysis deserve comment on limitation. First, the  
10 372 weaning process has constantly evolved during the years between 2012 and 2017. Since the  
11 373 importance of the weaning protocol emerged throughout the years, the focus on measures hereof  
12 374 and according documentation improved over the years as documentation became mandatory at our  
13 375 institution [8]. Furthermore, it was not possible matching the qualifications of staffing as a  
14 376 determinant of adherence to quality and curbing of costs. There is supposed to be a connection  
15 377 between experience and cost awareness [40]. Second, even though indicators and our study-ICU can  
16 378 be examined independently for research purposes, the QI and its progression are substantially  
17 379 connected to other intensive care indicators [19]. For further research, the interactions between the  
18 380 QIs and the progression on other ICUs need to be considered. Our results provide a robust  
19 381 assessment of the impact of changes of the quality adherence and robust evaluation of their effects.

## 23 382 **CONCLUSION**

25 383 While the need for critical care increases constantly for various reasons (e.g. demographic change or  
26 384 pandemic crisis), the challenge to provide high quality but cost-effective services will only become  
27 385 more important. Available resources differ among the various hospital sizes and types. Although we  
28 386 examined a single indicator for quality in a university reference center and found proof that high-  
29 387 adherence to it lead to significantly better clinical outcome, we think patients and hospitals in  
30 388 general benefit from high adherence to quality measures. Within the univariate analysis, major  
31 389 clinical parameters were significantly better in the HAG. Furthermore, we showed that adherence for  
32 390 65% or higher generated significantly higher median earnings within our univariate analysis.  
33 391 However, we also showed that the investigated quality indicator does not significantly affect  
34 392 economic results in our multivariate analysis. Instead, by using clinical parameters as proxies for  
35 393 clinical outcome, they were found to be the main drivers for according economic success. The reason  
36 394 for this is the increased number of patients who could be treated due to more total capacity, when  
37 395 LOS decreased due to higher quality. This is why the focus of this study is not only on reimbursement  
38 396 and on costs, but also on the direct effect of quality on the clinical outcome, which subsequently  
39 397 influences economic results.

44 398 Overall, quality matters for reimbursement, but reimbursement is not adjusted to the costs of  
45 399 providing quality. Since there is no central, structured and timely publication of comparable quality  
46 400 data in Germany, it is difficult for politics and assurances to reimburse on a pay for quality model as  
47 401 the basis for comparisons is missing as not mandatory. Still, as quality in treatment is decisive for the  
48 402 patient's hospital choice and the results of the treatment, QIs will be essential for public information  
49 403 and health economics as the patient decides where to be treated.

52 404

## 405 **Abbreviations**

406 QI: Quality indicator; ICU: Intensive care unit; HAG: High adherence group; LAG: Low adherence  
407 group; LOS: Length of stay; QM: Quality management; DRG: Diagnosis-related groups; VAP:  
408 ventilator-associated pneumonia ; PICS: post intensive care syndrome; CCI: chronic critical illness;  
409 PDMS: Patient data management system, KPI: Key performance indicator; SBT: Spontaneous  
410 breathing trial; CI: Confidence interval; APACHE II: Acute physiology and chronic health evaluation II;  
411 SAPS II: Simplified acute physiology score; SOFA: Sequential organ failure assessment; Average SOFA:  
412 Averaged daily SOFA score.

## 413 **Author contributions:**

414 CS introduced quality indicator based treatment for critically ill patients at Charité hospital in terms  
415 of both research and implementation in patient care. She perceived the underlying idea for this  
416 study. CS and FB set the aims and design of this study. AZ and RA performed data collection. AZ  
417 conducted statistical analysis supervised by JK. AZ shared responsibility for the study design, had full  
418 access to the data and drafted the manuscript. CS and OK contributed to the interpretation of data  
419 from a medical point of view, and specifically from the perspective of quality indicators. MH and MD  
420 contributed from the perspective of economics, RJ from the perspective of quality science. FB  
421 supervised the overall coordination of the study and contributed from the data science perspective.  
422 All authors critically reviewed and advised with their expertise on the manuscript.

423 **Funding:** This research received no specific grant from any funding agency in the public, commercial  
424 or not-for-profit sectors. This analysis is part of a quality improvement effort from the Department of  
425 Anesthesiology and Operative Intensive Care Medicine of the Charité Universitätsmedizin – Berlin,  
426 Campus Mitte and Virchow-Klinikum.

427 **Patient Consent:** Not required.

428 **Competing interests:** The authors declare that they have no competing interests related to this  
429 article. ICJME forms have been submitted to the editorial office.

430 AZ has nothing to declare. Dr. Kumpf has nothing to disclose. CS reports grants from Aridis  
431 Pharmaceutical Inc., grants from B. Braun Melsungen AG, grants from Drägerwerk AG & Co. KGaA,  
432 grants from Deutsche Forschungsgemeinschaft / German Research Society, grants from Deutsches  
433 Zentrum für Luft- und Raumfahrt e. V. (DLR) / German Aerospace Center, grants from Einstein  
434 Stiftung Berlin / Einstein Foundation Berlin, grants from European Society of Anaesthesiology, grants  
435 from Gemeinsamer Bundesausschuss / Federal Joint Committee (G-BA), grants from  
436 Inneruniversitäre Forschungsförderung / Inner University Grants, grants from Projektträger im DLR /  
437 Project Management Agency, grants from Stifterverband / Non-Profit Society Promoting Science and  
438 Education, grants from WHOCC, grants from Baxter Deutschland GmbH, grants from Cytosorbents  
439 Europe GmbH, grants from Edwards Lifesciences Germany GmbH, grants from Fresenius Medical  
440 Care, grants from Grünenthal GmbH, grants from Masimo Europe Ltd., grants from Pfizer Pharma PFE  
441 GmbH, personal fees from Georg Thieme Verlag, grants from Dr. F. Köhler Chemie GmbH, grants  
442 from Sintetica GmbH, grants from European Commission, grants from Stifterverband für die deutsche  
443 Wissenschaft e.V. / Philips, grants from Stiftung Charité, grants from AGUETTANT Deutschland  
444 GmbH, grants from AbbVie Deutschland GmbH & Co. KG, grants from Amomed Pharma GmbH,  
445 grants from InTouch Health, grants from Copra System GmbH, grants from Correvio GmbH, grants  
446 from Max-Planck-Gesellschaft zur Förderung der Wissenschaften e.V., grants from Deutsche  
447 Gesellschaft für Anästhesiologie & Intensivmedizin (DGAI), grants from Stifterverband für die  
448 deutsche Wissenschaft e.V. / Medtronic, grants from Philips Electronics Nederland BV, grants from  
449 BMH, outside the submitted work; In addition, Prof. Spies has a patent 10 2014 215 211.9 licensed, a

1  
2  
3  
4 450 patent 10 2014 215 212.9 licensed, a patent 10 2018 114 364.8 licensed, and a patent 10 2018 110  
5 451 275.5 licensed. MH has nothing to disclose. MD has nothing to disclose. RA has nothing to disclose. JK  
6 452 has nothing to disclose. RJ has nothing to disclose. FB reports grants from Einstein Foundation,  
7 453 personal fees from Axon Publishing, grants from Vifor Pharma, personal fees from Elsevier  
8 454 Publishing, grants from Federal Ministry of Health, Germany, grants from Berlin Institute of Health,  
9 455 outside the submitted work.

11 456 **Research Ethics Approval:** The study was approved by the Ethics Commission of Charité –  
12 457 Universitätsmedizin Berlin (EA2/139/20). The need for patient’s consent was waived due to the  
13 458 retrospective nature of the study.

15 459 **Data Availability Statement:** The datasets analyzed during the current study are available from the  
16 460 corresponding author on reasonable request.

17 461 **Clinical Trial Registration:** Not applicable.  
18  
19  
20  
21 462

463 **References**

- 464 1 Holtel M, Rossmuller T, Frommhold K. [Quality Management in Medicine: What the Surgeon  
465 Needs to Know]. *Zentralbl Chir* 2016;**141**:583–90. doi:10.1055/s-0035-1557892
- 466 2 Magunia P, Keller M, Rhode A. [Effects of quality-oriented remuneration]. *Unfallchirurg*  
467 2016;**119**:454–6. doi:10.1007/s00113-016-0172-6
- 468 3 Busse R, Geissler A, Aaviksoo A, *et al.* Diagnosis related groups in Europe: moving towards  
469 transparency, efficiency, and quality in hospitals? *BMJ* 2013;**346**:f3197.
- 470 4 Martin J, Neurohr C, Bauer M, *et al.* [Cost of intensive care in a German hospital: cost-unit  
471 accounting based on the InEK matrix]. *Anaesthetist* 2008;**57**:505–12. doi:10.1007/s00101-  
472 008-1353-7
- 473 5 Cooper LM, Linde-Zwirble WT. Medicare intensive care unit use: analysis of incidence, cost,  
474 and payment. *Crit Care Med* 2004;**32**:2247–53.
- 475 6 Funk G-C, Anders S, Breyer M-K, *et al.* Incidence and outcome of weaning from mechanical  
476 ventilation according to new categories. *Eur Respir J* 2010;**35**:88–94.  
477 doi:10.1183/09031936.00056909
- 478 7 Cox CE, Carson SS, Govert JA, *et al.* An economic evaluation of prolonged mechanical  
479 ventilation. *Crit Care Med* 2007;**35**:1918–27. doi:10.1097/01.CCM.0000275391.35834.10
- 480 8 Deutsche Gesellschaft für Anästhesiologie & Intensivmedizin. S3-Leitlinie Invasive Beatmung  
481 und Einsatz extrakorporaler Verfahren bei akuter respiratorischer Insuffizienz, Langversion,  
482 Stand 04.12.2017. 2017.www.intensivmedizin-leipzig.de (accessed 21 Nov 2018).
- 483 9 Ely EW, Baker AM, Dunagan DP, *et al.* Effect on the duration of mechanical ventilation of  
484 identifying patients capable of breathing spontaneously. *N Engl J Med* 1996;**335**:1864–9.  
485 doi:10.1056/NEJM199612193352502
- 486 10 Pham T, Brochard LJ, Slutsky AS. Mechanical Ventilation: State of the Art. *Mayo Clin Proc*  
487 2017;**92**:1382–400. doi:10.1016/j.mayocp.2017.05.004
- 488 11 Cohen IL, Booth F V. Cost containment and mechanical ventilation in the United States. *New*  
489 *Horiz* 1994;**2**:283–90.
- 490 12 Kumpf O. [Quality indicators in intensive care medicine : Background and practical use]. *Med*  
491 *Klin Intensivmed Notfmed* Published Online First: December 2019. doi:10.1007/s00063-019-  
492 00630-w
- 493 13 Ihra GC, Lehberger J, Hochrieser H, *et al.* Development of demographics and outcome of very  
494 old critically ill patients admitted to intensive care units. *Intensive Care Med* 2012;**38**:620–6.  
495 doi:10.1007/s00134-012-2474-7
- 496 14 Schönhofer B, Geiseler J, Pfeifer M, *et al.* [WeanNet: The network of weaning units of the DGP  
497 (Deutsche Gesellschaft für Pneumologie und Beatmungsmedizin) - results to epidemiology an  
498 outcome in patients with prolonged weaning]. *Dtsch Med Wochenschr* 2016;**141**:e166-72.  
499 doi:10.1055/s-0042-112345
- 500 15 Navalesi P, Frigerio P, Patzlaff A, *et al.* Prolonged weaning: from the intensive care unit to  
501 home. *Rev Port Pneumol* 2014;**20**:264–72. doi:10.1016/j.rppneu.2014.04.006
- 502 16 Braun J-P, Bause H, Bloos F, *et al.* Peer reviewing critical care: a pragmatic approach to quality  
503 management. *Ger Med Sci* 2010;**8**:Doc23. doi:10.3205/000112
- 504 17 Bundesministerium für Gesundheit. Qualitätssicherung im Krankenhausbereich. 2018;:2016–

- 1  
2  
3  
4 505 7.<https://www.bundesgesundheitsministerium.de/qualitaet-krankenhausversorgung.html>  
5 506 (accessed 3 Sep 2018).  
6  
7 507 18 Brinkmann A, Braun JP, Riessen R, *et al.* [Quality assurance concepts in intensive care  
8 508 medicine]. *Med Klin Intensivmed Notfmed* 2015;**110**:575-580,582-583. doi:10.1007/s00063-  
9 509 015-0095-y  
10  
11 510 19 Kumpf O, Braun J-P, Brinkmann A, *et al.* Quality indicators in intensive care medicine for  
12 511 Germany - third edition 2017. *Ger Med Sci* 2017;**15**:Doc10. doi:10.3205/000251  
13  
14 512 20 Sogaard R, Enemark U. The cost-quality relationship in European hospitals: a systematic  
15 513 review. *J Health Serv Res Policy* 2017;**22**:126–33. doi:10.1177/1355819616682283  
16  
17 514 21 Donabedian A. The role of outcomes in quality assessment and assurance. *QRB Qual Rev Bull*  
18 515 1992;**18**:356–60.  
19  
20 516 22 Spies C, Kastrup M, Kerner T *et al.* *SOPs in Anästhesiologie und Schmerztherapie*. Thieme  
21 517 2013. doi:10.1055/b-002-57140  
22  
23 518 23 Kastrup M, von Dossow V, Seeling M, *et al.* Key performance indicators in intensive care  
24 519 medicine. A retrospective matched cohort study. *J Int Med Res* 2009;**37**:1267–84.  
25 520 doi:10.1177/147323000903700502  
26  
27 521 24 Fadila M, Regunath H. *Ventilator Weaning*. Treasure Island (FL): 2018.  
28  
29 522 25 Nachtigall I, Tamarkin A, Tafelski S, *et al.* Impact of adherence to standard operating  
30 523 procedures for pneumonia on outcome of intensive care unit patients. *Crit Care Med*  
31 524 2009;**37**:159–66. doi:10.1097/CCM.0b013e3181934f1b  
32  
33 525 26 Rapoport J, Teres D, Zhao Y, *et al.* Length of stay data as a guide to hospital economic  
34 526 performance for ICU patients. *Med Care* 2003;**41**:386–97.  
35 527 doi:10.1097/01.MLR.0000053021.93198.96  
36  
37 528 27 Brochard L, Rauss A, Benito S, *et al.* Comparison of three methods of gradual withdrawal from  
38 529 ventilatory support during weaning from mechanical ventilation. *Am J Respir Crit Care Med*  
39 530 1994;**150**:896–903. doi:10.1164/ajrccm.150.4.7921460  
40  
41 531 28 Vitacca M, Vianello A, Colombo D, *et al.* Comparison of two methods for weaning patients  
42 532 with chronic obstructive pulmonary disease requiring mechanical ventilation for more than 15  
43 533 days. *Am J Respir Crit Care Med* 2001;**164**:225–30. doi:10.1164/ajrccm.164.2.2008160  
44  
45 534 29 Kastrup M, Nolting MJ, Ahlborn R, *et al.* An electronic tool for visual feedback to monitor the  
46 535 adherence to quality indicators in intensive care medicine. *J Int Med Res* 2011;**39**:2187–200.  
47 536 doi:10.1177/147323001103900615  
48  
49 537 30 Smyrnios NA, Connolly A, Wilson MM, *et al.* Effects of a multifaceted, multidisciplinary,  
50 538 hospital-wide quality improvement program on weaning from mechanical ventilation. *Crit*  
51 539 *Care Med* 2002;**30**:1224–30. doi:10.1097/00003246-200206000-00009  
52  
53 540 31 Lindenauer PK, Remus D, Roman S, *et al.* Public reporting and pay for performance in hospital  
54 541 quality improvement. *N Engl J Med* 2007;**356**:486–96. doi:10.1056/NEJMsa064964  
55  
56 542 32 Girard TD, Kress JP, Fuchs BD, *et al.* Efficacy and safety of a paired sedation and ventilator  
57 543 weaning protocol for mechanically ventilated patients in intensive care (Awakening and  
58 544 Breathing Controlled trial): a randomised controlled trial. *Lancet (London, England)*  
59 545 2008;**371**:126–34. doi:10.1016/S0140-6736(08)60105-1  
60  
546 33 Kastrup M, Seeling M, Barthel S, *et al.* Effects of intensivist coverage in a post-anaesthesia  
547 care unit on surgical patients' case mix and characteristics of the intensive care unit. *Crit Care*

- 1  
2  
3  
4 548 2012;**16**:R126. doi:10.1186/cc11428
- 5 549 34 Soo Hoo GW, Wen YE, Nguyen T V, *et al.* Impact of clinical guidelines in the management of  
6 550 severe hospital-acquired pneumonia. *Chest* 2005;**128**:2778–87. doi:10.1378/chest.128.4.2778
- 8 551 35 InEK GmbH. Kalkulation von Behandlungskosten. 2016. [https://www.g-](https://www.g-drg.de/Kalkulation2/DRG-Fallpauschalen_17b_KHG/Kalkulationshandbuch)  
9 552 [drg.de/Kalkulation2/DRG-Fallpauschalen\\_17b\\_KHG/Kalkulationshandbuch](https://www.g-drg.de/Kalkulation2/DRG-Fallpauschalen_17b_KHG/Kalkulationshandbuch)
- 11 553 36 Riessen R, Hermes C, Bodmann K-F, *et al.* [Reimbursement of intensive care services in the  
12 554 German DRG system : Current problems and possible solutions]. *Med Klin Intensivmed*  
13 555 *Notfmed* 2018;**113**:13–23. doi:10.1007/s00063-017-0390-x
- 15 556 37 Nguyen Y-L, Wallace DJ, Yordanov Y, *et al.* The Volume-Outcome Relationship in Critical Care:  
16 557 A Systematic Review and Meta-analysis. *Chest* 2015;**148**:79–92. doi:10.1378/chest.14-2195
- 18 558 38 Blumenthal D, Abrams MK. Tailoring Complex Care Management for High-Need, High-Cost  
19 559 Patients. *JAMA* 2016;**316**:1657–8. doi:10.1001/jama.2016.12388
- 21 560 39 Riessen R, Markewitz A, Grigoleit M, *et al.* [Discussion paper for a hospital financing reform in  
22 561 Germany from the perspective of intensive care medicine]. *Med Klin Intensivmed Notfmed*  
23 562 2020;**115**:59–66. doi:10.1007/s00063-019-00629-3
- 25 563 40 Wunsch H, Gershengorn H, Scales DC. Economics of ICU organization and management. *Crit*  
26 564 *Care Clin* 2012;**28**:25–37, v. doi:10.1016/j.ccc.2011.09.004

28 565

30 566



1  
2  
3  
4  
5  
6  
7  
8  
9  
10  
11  
12  
13  
14  
15  
16  
17  
18  
19  
20  
21  
22  
23  
24  
25  
26  
27  
28  
29  
30  
31  
32  
33  
34  
35  
36  
37  
38  
39  
40  
41  
42  
43  
44  
45  
46  
47  
48  
49  
50  
51  
52  
53  
54  
55  
56  
57  
58  
59  
60

567 **Figure Legend:**

568 Figure 1 Patient Inclusion and Exclusion Criteria. Flowchart of the process used in the present study  
569 for patient record inclusion. Numbers listed are number of patients in each group

For peer review only

1  
2  
3  
4  
5  
6  
7  
8  
9  
10  
11  
12  
13  
14  
15  
16  
17  
18  
19  
20  
21  
22  
23  
24  
25  
26  
27  
28  
29  
30  
31  
32  
33  
34  
35  
36  
37  
38  
39  
40  
41

Consecutive patients  
included (n=3,063), admitted between  
Jan. 2012 and Dec. 2017 to Study-ICU

<18 years (n=29)

Duration of ventilation on ICU below 95 hours (n=975)

Receiving no invasive ventilation OR no ventilation (n=747)

Status „Do-Not-Reanimate“ OR „Do-Not-Resuscitate“ OR „Do not  
Escalate“ OR „Organ Donation“ (no KPIs documented) OR „Therapy  
Freeze“ (n=68)

Admission to Hospital before 2012 OR Discharge from  
hospital after 2017 (n=19)

Incomplete electronic patient record (Incomplete data) (n=71)

No status of „Ready to wean“ (n=571)

Included Patients (n=583)

**Supplemental table 1: Institutional Criteria – Readiness to Wean**

| <b>Prerequisite for performing a spontaneous breathing trial (SBT).</b>                         |                                                                                                                                                                                                                                                                                                                                                                                                                                                  |
|-------------------------------------------------------------------------------------------------|--------------------------------------------------------------------------------------------------------------------------------------------------------------------------------------------------------------------------------------------------------------------------------------------------------------------------------------------------------------------------------------------------------------------------------------------------|
| clinical criteria                                                                               | <ul style="list-style-type: none"> <li>• Ventilation &gt; 24 h</li> <li>• Disappearance of indication for ventilation</li> </ul>                                                                                                                                                                                                                                                                                                                 |
| respiratory criteria                                                                            | <ul style="list-style-type: none"> <li>• <math>FiO_2 \leq 0.4</math></li> <li>• Oxygen saturation <math>\geq 90\%</math></li> <li>• PEEP <math>\leq 8</math> cmH<sub>2</sub>O (&gt; 1h)</li> <li>• AMV &lt; 15l /min</li> <li>• AF &lt; 35 / min</li> </ul>                                                                                                                                                                                      |
| Rapid Shallow Breathing Index (RSBI)<br>(breathing frequency divided by tidal volume in litres) | <p>Goal is &lt; 100-105 breaths / min/l</p> <p>RSBI can predict successful SBT with a sensitivity of 97% and a specificity of 65%</p>                                                                                                                                                                                                                                                                                                            |
| haemodynamic criteria                                                                           | <ul style="list-style-type: none"> <li>• no acute myocardial ischaemia, no cardiogenic shock</li> <li>• No catecholamines: (allowed: norepinephrine/adrenaline <math>\leq 0.2 \mu\text{g} / \text{kg KG} / \text{min}</math>, Enoximone <math>\leq 5 \mu\text{g} / \text{kg KG} / \text{min}</math> or Dobutamine <math>\leq 5 \mu\text{g} / \text{kg KG} / \text{min}</math>)</li> <li>• no new haemodynamically relevant arrhythmia</li> </ul> |
| Criterion alertness                                                                             | <ul style="list-style-type: none"> <li>• RASS score 0 or – 1</li> <li>• where applicable. GCS <math>\geq 8</math> in neurosurgical/neurological patients</li> <li>• Protective reflexes (coughing and swallowing) present</li> </ul>                                                                                                                                                                                                             |
| metabolic criteria                                                                              | <ul style="list-style-type: none"> <li>• Temperature &lt; 38.5 °C</li> </ul>                                                                                                                                                                                                                                                                                                                                                                     |

**Supplemental table 2: Quality indicator (Weaning and other measures to prevent ventilator associated pneumonias (short: Weaning/VAP Bundle))** (Displayed are only items of the indicator relevant to weaning, for complete display see full version of the publication)

| Name of the indicator                               | Weaning and other measures to prevent ventilator associated pneumonias (short: Weaning/VAP Bundle)                                                                                                                                                                                                                                                                                                                                                                                                                                                                                                                                                                                                                                                                                                                                                                                                                                                        |      |
|-----------------------------------------------------|-----------------------------------------------------------------------------------------------------------------------------------------------------------------------------------------------------------------------------------------------------------------------------------------------------------------------------------------------------------------------------------------------------------------------------------------------------------------------------------------------------------------------------------------------------------------------------------------------------------------------------------------------------------------------------------------------------------------------------------------------------------------------------------------------------------------------------------------------------------------------------------------------------------------------------------------------------------|------|
| Dimension                                           | Effectiveness and risk                                                                                                                                                                                                                                                                                                                                                                                                                                                                                                                                                                                                                                                                                                                                                                                                                                                                                                                                    |      |
| Justification                                       | <p>Ventilator associated pneumonias are a large problem in intensive care medicine. Pathogens typically get into the subglottic respiratory tract via aspiration of nasopharyngeal colonization (micro aspiration). The quality indicator IV should result in the prevention and reduction of ventilator associated pneumonias. It is measured by two processes in daily routine care:</p> <p>a) Measures to reduce the length of ventilator support (including non-invasive ventilation and weaning) and</p> <p>b) Measures effective with this regard are:</p> <p>a) Weaning protocol/concept in combination with sedation goals. In every mechanically ventilated patient (controlled ventilation) a daily evaluation for weaning possibility should be performed. This has to be seen in the context of QI II. This represents a daily sedation goal and documentation and</p> <p>b) Measures to reduce the microaspiration of pathogenic agents.</p> |      |
| Structure                                           | Daily documentation of goals for ventilatory support /Weaning: yes/no and...                                                                                                                                                                                                                                                                                                                                                                                                                                                                                                                                                                                                                                                                                                                                                                                                                                                                              |      |
| Process                                             | Peer review                                                                                                                                                                                                                                                                                                                                                                                                                                                                                                                                                                                                                                                                                                                                                                                                                                                                                                                                               |      |
| Population                                          | All mechanically ventilated patients                                                                                                                                                                                                                                                                                                                                                                                                                                                                                                                                                                                                                                                                                                                                                                                                                                                                                                                      |      |
| Formula (process)<br>QI IVa                         | <p>Number of mechanically ventilated patients with daily documentation of a weaning trial (begin or ongoing) has been started</p> <p>Total number of all mechanically ventilated patients</p>                                                                                                                                                                                                                                                                                                                                                                                                                                                                                                                                                                                                                                                                                                                                                             | x100 |
| Type                                                | Structure, process and outcome                                                                                                                                                                                                                                                                                                                                                                                                                                                                                                                                                                                                                                                                                                                                                                                                                                                                                                                            |      |
| Source of data                                      | <p>1. Structure: Query</p> <p>2. Process: Morning round (Visitation) Check: NIV-indication yes/no (Patient file, PDMS, Peer Review), VAP-Bundle implemented</p> <p>3. Outcome: Results of the KISS/SARI-ICU Surveillance (annual report)</p>                                                                                                                                                                                                                                                                                                                                                                                                                                                                                                                                                                                                                                                                                                              |      |
| Standard:<br>Structure: yes/no<br>Execution: yes/no | <p>1. Structure: yes &gt;95%</p> <p>2. Process: &gt;70% Number of positive answers</p> <p>3. Missing values &lt;20%</p>                                                                                                                                                                                                                                                                                                                                                                                                                                                                                                                                                                                                                                                                                                                                                                                                                                   |      |
| Explanation of the terminology                      | <p><i>Weaning trial</i>: Planned intention to disconnect the patient from ventilatory support by beginning a spontaneous breathing trial with one of the following methods:</p> <ul style="list-style-type: none"> <li>o T-piece</li> <li>o Pressure support ventilation (support pressure 7cmH2O</li> <li>o Continuous positive airway pressure of 5cmH2O (CPAP)</li> <li>o Synchronized intermittent mandatory ventilation (SIMV) is excluded</li> <li>o Non-invasive ventilation includes measures for ventilatory support without translaryngeal devices</li> </ul>                                                                                                                                                                                                                                                                                                                                                                                   |      |
| Comments                                            | <p>In the view of the authors, it seems more practicable to define this indicator with patients on mechanical ventilation rather than days on mechanical ventilation, especially since weaning trials are not routinely detected by IT-systems and this also helps keeping the exclusion criteria.</p> <p>Measures for point 2, 4, 5 can be extracted from the patients file measures under point 3 should be defined in a standard be checked there.</p> <p>QI IVa: We recommend evaluation if daily trials have been attempted and if they were attempted in patients meeting inclusion criteria for such a trial.</p>                                                                                                                                                                                                                                                                                                                                  |      |

Full version at: GMS Ger Med Sci 2013;11:Doc09; doi: 10.3205/000177

# Reporting checklist for economic evaluation of health interventions.

Based on the CHEERS guidelines.

|                                 | Reporting Item                                                                                                                                                                                            | Page Number |
|---------------------------------|-----------------------------------------------------------------------------------------------------------------------------------------------------------------------------------------------------------|-------------|
| <b>Title</b>                    |                                                                                                                                                                                                           |             |
|                                 | <a href="#">#1</a> Identify the study as an economic evaluation or use more specific terms such as “cost-effectiveness analysis”, and describe the interventions compared.                                | 1           |
| <b>Abstract</b>                 |                                                                                                                                                                                                           |             |
|                                 | <a href="#">#2</a> Provide a structured summary of objectives, perspective, setting, methods (including study design and inputs), results (including base case and uncertainty analyses), and conclusions | 2           |
| <b>Introduction</b>             |                                                                                                                                                                                                           |             |
| Background and objectives       | <a href="#">#3</a> Provide an explicit statement of the broader context for the study. Present the study question and its relevance for health policy or practice decisions                               | 3           |
| <b>Methods</b>                  |                                                                                                                                                                                                           |             |
| Target population and subgroups | <a href="#">#4</a> Describe characteristics of the base case population and subgroups analysed, including why they were chosen.                                                                           | 4           |
| Setting and location            | <a href="#">#5</a> State relevant aspects of the system(s) in which the decision(s) need(s) to be made.                                                                                                   | 4           |
| Study perspective               | <a href="#">#6</a> Describe the perspective of the study and relate this to the costs being evaluated.                                                                                                    | 4           |
| Comparators                     | <a href="#">#7</a> Describe the interventions or strategies being compared and state why they were chosen.                                                                                                | 5           |

|    |                                                        |                      |                                                                                                                                                                                                                                                                                                                     |     |
|----|--------------------------------------------------------|----------------------|---------------------------------------------------------------------------------------------------------------------------------------------------------------------------------------------------------------------------------------------------------------------------------------------------------------------|-----|
| 1  | Time horizon                                           | <a href="#">#8</a>   | State the time horizon(s) over which costs and consequences are being evaluated and say why appropriate.                                                                                                                                                                                                            | 4   |
| 2  |                                                        |                      |                                                                                                                                                                                                                                                                                                                     |     |
| 3  |                                                        |                      |                                                                                                                                                                                                                                                                                                                     |     |
| 4  |                                                        |                      |                                                                                                                                                                                                                                                                                                                     |     |
| 5  |                                                        |                      |                                                                                                                                                                                                                                                                                                                     |     |
| 6  | Discount rate                                          | <a href="#">#9</a>   | Report the choice of discount rate(s) used for costs and outcomes and say why appropriate                                                                                                                                                                                                                           | 5   |
| 7  |                                                        |                      |                                                                                                                                                                                                                                                                                                                     |     |
| 8  |                                                        |                      |                                                                                                                                                                                                                                                                                                                     |     |
| 9  |                                                        |                      |                                                                                                                                                                                                                                                                                                                     |     |
| 10 | Choice of health outcomes                              | <a href="#">#10</a>  | Describe what outcomes were used as the measure(s) of benefit in the evaluation and their relevance for the type of analysis performed                                                                                                                                                                              | 6   |
| 11 |                                                        |                      |                                                                                                                                                                                                                                                                                                                     |     |
| 12 |                                                        |                      |                                                                                                                                                                                                                                                                                                                     |     |
| 13 |                                                        |                      |                                                                                                                                                                                                                                                                                                                     |     |
| 14 |                                                        |                      |                                                                                                                                                                                                                                                                                                                     |     |
| 15 |                                                        |                      |                                                                                                                                                                                                                                                                                                                     |     |
| 16 | Measurement of effectiveness                           | <a href="#">#11a</a> | Single study-based estimates: Describe fully the design features of the single effectiveness study and why the single study was a sufficient source of clinical effectiveness data                                                                                                                                  | 4   |
| 17 |                                                        |                      |                                                                                                                                                                                                                                                                                                                     |     |
| 18 |                                                        |                      |                                                                                                                                                                                                                                                                                                                     |     |
| 19 |                                                        |                      |                                                                                                                                                                                                                                                                                                                     |     |
| 20 |                                                        |                      |                                                                                                                                                                                                                                                                                                                     |     |
| 21 |                                                        |                      |                                                                                                                                                                                                                                                                                                                     |     |
| 22 |                                                        |                      |                                                                                                                                                                                                                                                                                                                     |     |
| 23 | Measurement of effectiveness                           | <a href="#">#11b</a> | Synthesis-based estimates: Describe fully the methods used for identification of included studies and synthesis of clinical effectiveness data                                                                                                                                                                      | 5   |
| 24 |                                                        |                      |                                                                                                                                                                                                                                                                                                                     |     |
| 25 |                                                        |                      |                                                                                                                                                                                                                                                                                                                     |     |
| 26 |                                                        |                      |                                                                                                                                                                                                                                                                                                                     |     |
| 27 |                                                        |                      |                                                                                                                                                                                                                                                                                                                     |     |
| 28 |                                                        |                      |                                                                                                                                                                                                                                                                                                                     |     |
| 29 | Measurement and valuation of preference based outcomes | <a href="#">#12</a>  | If applicable, describe the population and methods used to elicit preferences for outcomes.                                                                                                                                                                                                                         | n/a |
| 30 |                                                        |                      |                                                                                                                                                                                                                                                                                                                     |     |
| 31 |                                                        |                      |                                                                                                                                                                                                                                                                                                                     |     |
| 32 |                                                        |                      |                                                                                                                                                                                                                                                                                                                     |     |
| 33 |                                                        |                      |                                                                                                                                                                                                                                                                                                                     |     |
| 34 |                                                        |                      |                                                                                                                                                                                                                                                                                                                     |     |
| 35 |                                                        |                      |                                                                                                                                                                                                                                                                                                                     |     |
| 36 | **Estimating resources and costs **                    |                      |                                                                                                                                                                                                                                                                                                                     |     |
| 37 |                                                        |                      |                                                                                                                                                                                                                                                                                                                     |     |
| 38 |                                                        |                      |                                                                                                                                                                                                                                                                                                                     |     |
| 39 |                                                        |                      |                                                                                                                                                                                                                                                                                                                     |     |
| 40 |                                                        |                      |                                                                                                                                                                                                                                                                                                                     |     |
| 41 |                                                        |                      |                                                                                                                                                                                                                                                                                                                     |     |
| 42 |                                                        | <a href="#">#13a</a> | Single study-based economic evaluation: Describe approaches used to estimate resource use associated with the alternative interventions. Describe primary or secondary research methods for valuing each resource item in terms of its unit cost. Describe any adjustments made to approximate to opportunity costs | 6   |
| 43 |                                                        |                      |                                                                                                                                                                                                                                                                                                                     |     |
| 44 |                                                        |                      |                                                                                                                                                                                                                                                                                                                     |     |
| 45 |                                                        |                      |                                                                                                                                                                                                                                                                                                                     |     |
| 46 |                                                        |                      |                                                                                                                                                                                                                                                                                                                     |     |
| 47 |                                                        |                      |                                                                                                                                                                                                                                                                                                                     |     |
| 48 |                                                        |                      |                                                                                                                                                                                                                                                                                                                     |     |
| 49 |                                                        |                      |                                                                                                                                                                                                                                                                                                                     |     |
| 50 |                                                        |                      |                                                                                                                                                                                                                                                                                                                     |     |
| 51 |                                                        |                      |                                                                                                                                                                                                                                                                                                                     |     |
| 52 | <b>Methods</b>                                         |                      |                                                                                                                                                                                                                                                                                                                     |     |
| 53 |                                                        |                      |                                                                                                                                                                                                                                                                                                                     |     |
| 54 |                                                        |                      |                                                                                                                                                                                                                                                                                                                     |     |
| 55 | Estimating resources and costs                         | <a href="#">#13b</a> | Model-based economic evaluation: Describe approaches and data sources used to estimate resource use associated with model health states. Describe primary or                                                                                                                                                        | n/a |
| 56 |                                                        |                      |                                                                                                                                                                                                                                                                                                                     |     |
| 57 |                                                        |                      |                                                                                                                                                                                                                                                                                                                     |     |
| 58 |                                                        |                      |                                                                                                                                                                                                                                                                                                                     |     |
| 59 |                                                        |                      |                                                                                                                                                                                                                                                                                                                     |     |
| 60 |                                                        |                      |                                                                                                                                                                                                                                                                                                                     |     |

secondary research methods for valuing each resource item in terms of its unit cost. Describe any adjustments made to approximate to opportunity costs.

|    |                       |                                                          |     |
|----|-----------------------|----------------------------------------------------------|-----|
| 1  |                       |                                                          |     |
| 2  |                       |                                                          |     |
| 3  |                       |                                                          |     |
| 4  |                       |                                                          |     |
| 5  |                       |                                                          |     |
| 6  | Currency, price date, | <a href="#">#14</a>                                      | n/a |
| 7  | and conversion        | Report the dates of the estimated resource quantities    |     |
| 8  |                       | and unit costs. Describe methods for adjusting estimated |     |
| 9  |                       | unit costs to the year of reported costs if necessary.   |     |
| 10 |                       | Describe methods for converting costs into a common      |     |
| 11 |                       | currency base and the exchange rate.                     |     |
| 12 |                       |                                                          |     |
| 13 |                       |                                                          |     |
| 14 | Choice of model       | <a href="#">#15</a>                                      | 6   |
| 15 |                       | Describe and give reasons for the specific type of       |     |
| 16 |                       | decision analytical model used. Providing a figure to    |     |
| 17 |                       | show model structure is strongly recommended.            |     |
| 18 |                       |                                                          |     |
| 19 |                       |                                                          |     |
| 20 | Assumptions           | <a href="#">#16</a>                                      | 6   |
| 21 |                       | Describe all structural or other assumptions             |     |
| 22 |                       | underpinning the decision-analytical model.              |     |
| 23 |                       |                                                          |     |
| 24 | Analytical methods    | <a href="#">#17</a>                                      | 6   |
| 25 |                       | Describe all analytical methods supporting the           |     |
| 26 |                       | evaluation. This could include methods for dealing with  |     |
| 27 |                       | skewed, missing, or censored data; extrapolation         |     |
| 28 |                       | methods; methods for pooling data; approaches to         |     |
| 29 |                       | validate or make adjustments (such as half cycle         |     |
| 30 |                       | corrections) to a model; and methods for handling        |     |
| 31 |                       | population heterogeneity and uncertainty.                |     |
| 32 |                       |                                                          |     |
| 33 |                       |                                                          |     |
| 34 |                       |                                                          |     |
| 35 |                       |                                                          |     |
| 36 | <b>Results</b>        |                                                          |     |
| 37 |                       |                                                          |     |
| 38 | Study parameters      | <a href="#">#18</a>                                      | 6   |
| 39 |                       | Report the values, ranges, references, and, if used,     |     |
| 40 |                       | probability distributions for all parameters. Report     |     |
| 41 |                       | reasons or sources for distributions used to represent   |     |
| 42 |                       | uncertainty where appropriate. Providing a table to show |     |
| 43 |                       | the input values is strongly recommended.                |     |
| 44 |                       |                                                          |     |
| 45 |                       |                                                          |     |
| 46 |                       |                                                          |     |
| 47 | Incremental costs and | <a href="#">#19</a>                                      | 6-7 |
| 48 | outcomes              | For each intervention, report mean values for the main   |     |
| 49 |                       | categories of estimated costs and outcomes of interest,  |     |
| 50 |                       | as well as mean differences between the comparator       |     |
| 51 |                       | groups. If applicable, report incremental cost-          |     |
| 52 |                       | effectiveness ratios.                                    |     |
| 53 |                       |                                                          |     |
| 54 |                       |                                                          |     |
| 55 | Characterising        | <a href="#">#20a</a>                                     | n/a |
| 56 | uncertainty           | Single study-based economic evaluation: Describe the     |     |
| 57 |                       | effects of sampling uncertainty for the estimated        |     |
| 58 |                       | incremental cost and incremental effectiveness           |     |
| 59 |                       |                                                          |     |
| 60 |                       |                                                          |     |

parameters, together with the impact of methodological assumptions (such as discount rate, study perspective).

|    |                       |                      |                                                               |
|----|-----------------------|----------------------|---------------------------------------------------------------|
| 1  |                       |                      |                                                               |
| 2  |                       |                      |                                                               |
| 3  |                       |                      |                                                               |
| 4  | Characterising        | <a href="#">#20b</a> | Model-based economic evaluation: Describe the effects         |
| 5  | uncertainty           |                      | on the results of uncertainty for all input parameters, and   |
| 6  |                       |                      | uncertainty related to the structure of the model and         |
| 7  |                       |                      | assumptions.                                                  |
| 8  |                       |                      |                                                               |
| 9  |                       |                      |                                                               |
| 10 |                       |                      |                                                               |
| 11 | Characterising        | <a href="#">#21</a>  | If applicable, report differences in costs, outcomes, or      |
| 12 | heterogeneity         |                      | cost effectiveness that can be explained by variations        |
| 13 |                       |                      | between subgroups of patients with different baseline         |
| 14 |                       |                      | characteristics or other observed variability in effects that |
| 15 |                       |                      | are not reducible by more information.                        |
| 16 |                       |                      |                                                               |
| 17 |                       |                      |                                                               |
| 18 |                       |                      |                                                               |
| 19 |                       |                      |                                                               |
| 20 | <b>Discussion</b>     |                      |                                                               |
| 21 |                       |                      |                                                               |
| 22 | Study findings,       | <a href="#">#22</a>  | Summarise key study findings and describe how they            |
| 23 | limitations,          |                      | support the conclusions reached. Discuss limitations and      |
| 24 | generalisability, and |                      | the generalisability of the findings and how the findings     |
| 25 | current knowledge     |                      | fit with current knowledge.                                   |
| 26 |                       |                      |                                                               |
| 27 |                       |                      |                                                               |
| 28 |                       |                      |                                                               |
| 29 | <b>Other</b>          |                      |                                                               |
| 30 |                       |                      |                                                               |
| 31 |                       |                      |                                                               |
| 32 | Source of funding     | <a href="#">#23</a>  | Describe how the study was funded and the role of the         |
| 33 |                       |                      | funder in the identification, design, conduct, and            |
| 34 |                       |                      | reporting of the analysis. Describe other non-monetary        |
| 35 |                       |                      | sources of support                                            |
| 36 |                       |                      |                                                               |
| 37 |                       |                      |                                                               |
| 38 |                       |                      |                                                               |
| 39 | Conflict of interest  | <a href="#">#24</a>  | Describe any potential for conflict of interest of study      |
| 40 |                       |                      | contributors in accordance with journal policy. In the        |
| 41 |                       |                      | absence of a journal policy, we recommend authors             |
| 42 |                       |                      | comply with International Committee of Medical Journal        |
| 43 |                       |                      | Editors recommendations                                       |
| 44 |                       |                      |                                                               |
| 45 |                       |                      |                                                               |
| 46 |                       |                      |                                                               |

The CHEERS checklist is distributed under the terms of the Creative Commons Attribution License CC-BY-NC. This checklist was completed on 09. September 2020 using <https://www.goodreports.org/>, a tool made by the [EQUATOR Network](#) in collaboration with [Penelope.ai](#)
